1  
2  
3  
4  
5  
6  
7  
8  
9  
10  
11  
12  
13  
14  
15  
16  
17  
18  
19  
20  
21  
22  
23  
24  
25  
26  
27  
28  
29  
30  
31  
32  
33  
34  
35  
36  
37  
38

# **A direct and widespread role for the nuclear receptor EcR in mediating the response to ecdysone in *Drosophila***

Christopher M. Uyehara<sup>1-4</sup> and Daniel J. McKay<sup>1,2,4\*</sup>

<sup>1</sup>Department of Biology, <sup>2</sup>Department of Genetics, <sup>3</sup>Curriculum in Genetics and Molecular Biology, <sup>4</sup>Integrative Program for Biological and Genome Sciences, The University of North Carolina at Chapel Hill, Chapel Hill, NC, 27599

\*Corresponding author:  
Daniel J. McKay  
Assistant Professor  
Department of Biology, Department of Genetics, Integrative Program for Biological and Genome Sciences  
The University of North Carolina at Chapel Hill  
Chapel Hill, NC 27599, USA  
Phone: (919) 843-2064  
Email: [dmckay1@email.unc.edu](mailto:dmckay1@email.unc.edu)

39 **ABSTRACT:**

40 The ecdysone pathway was amongst the first experimental systems employed to study the impact  
41 of steroid hormones on the genome. In *Drosophila* and other insects, ecdysone coordinates  
42 developmental transitions, including wholesale transformation of the larva into the adult during  
43 metamorphosis. Like other hormones, ecdysone controls gene expression through a nuclear  
44 receptor, which functions as a ligand-dependent transcription factor. Although it is clear that  
45 ecdysone elicits distinct transcriptional responses within its different target tissues, the role of its  
46 receptor, EcR, in regulating target gene expression is incompletely understood. In particular, EcR  
47 initiates a cascade of transcription factor expression in response to ecdysone, making it unclear  
48 which ecdysone-responsive genes are direct EcR targets. Here, we use the larval-to-prepupal  
49 transition of developing wings to examine the role of EcR in gene regulation. Genome-wide DNA  
50 binding profiles reveal that EcR exhibits widespread binding across the genome, including at many  
51 canonical ecdysone-response genes. However, the majority of its binding sites reside at genes with  
52 wing-specific functions. We also find that EcR binding is temporally dynamic, with thousands of  
53 binding sites changing over time. RNA-seq reveals that EcR acts as both a temporal gate to block  
54 precocious entry to the next developmental stage as well as a temporal trigger to promote the  
55 subsequent program. Finally, transgenic reporter analysis indicates that EcR regulates not only  
56 temporal changes in target enhancer activity but also spatial patterns. Together, these studies define  
57 EcR as a multipurpose, direct regulator of gene expression, greatly expanding its role in  
58 coordinating developmental transitions.

59

60 **KEYWORDS:**

61 Hormone, Transcription Factor, CUT&RUN

62

63 **SIGNIFICANCE:**

64 Nuclear receptors (NRs) are sequence-specific DNA binding proteins that act as intracellular  
65 receptors for small molecules such as hormones. Prior work has shown that NRs function as ligand-  
66 dependent switches that initiate a cascade of gene expression changes. The extent to which NRs  
67 function as direct regulators of downstream genes in these hierarchies remains incompletely  
68 understood. Here, we study the role of the NR EcR in metamorphosis of the *Drosophila* wing. We  
69 find that EcR directly regulates many genes at the top of the hierarchy as well as at downstream  
70 genes. Further, we find that EcR binds distinct sets of target genes at different developmental  
71 times. This work helps inform how hormones elicit tissue- and temporal-specific responses in  
72 target tissues.

73 **INTRODUCTION:**

74           Hormones function as critical regulators of a diverse set of physiological and  
75 developmental processes, including reproduction, immune system function, and metabolism.  
76 During development, hormones act as long-range signals to coordinate the timing of events  
77 between distant tissues. The effects of hormone signaling are mediated by nuclear receptors, which  
78 function as transcription factors that differentially regulate gene expression in a hormone-  
79 dependent manner. Whereas many of the co-regulators that contribute to nuclear receptor function  
80 have been identified, the mechanisms used by these factors to generate distinct, yet appropriate,  
81 transcriptional responses in different target tissues are incompletely understood.

82           Ecdysone signaling has long served as a paradigm to understand how hormones generate  
83 spatial and temporal-specific biological responses. In *Drosophila*, ecdysone is produced in the  
84 prothoracic gland and is released systemically at stereotypical stages of development (1, 2). Pulses  
85 of ecdysone are required for transitions between developmental stages, such as the larval molts. A  
86 high titer pulse of ecdysone triggers the end of larval development and the beginning of  
87 metamorphosis (1, 2). With each pulse, ecdysone travels through the hemolymph to reach target  
88 tissues, where it enters cells and binds its receptor, a heterodimer of the proteins EcR (*Ecdysone*  
89 *receptor*, a homolog of the mammalian Farnesoid X Receptor) and Usp (*ultraspiracle*, homolog  
90 of mammalian RXR) (3–5). In the absence of ecdysone, EcR/Usp is nuclear-localized and bound  
91 to DNA where it is thought to act as a transcriptional repressor (6, 7). Upon ecdysone binding,  
92 EcR/Usp switches to a transcriptional activator (6). Consistent with the dual regulatory capacity  
93 of EcR/Usp, a variety of co-activator and co-repressor complexes have been shown to function  
94 with this heterodimer to regulate gene expression (7–13).

95           Understanding how ecdysone exerts its effects on the genome has been heavily influenced  
96 by the work of Ashburner and colleagues in the 1970's. By culturing larval salivary glands *in vitro*,  
97 Ashburner described a sequence of visible puffs that appear in the giant polytene chromosomes  
98 upon addition of ecdysone (14, 15). A small number of puffs appeared immediately after ecdysone  
99 addition, followed by the appearance of more than one hundred additional puffs over the next  
100 several hours (14–16). The appearance of early puffs was found to be independent of protein  
101 synthesis, suggesting direct action by EcR/Usp, whereas the appearance of late puffs was not,  
102 suggesting they require the protein products of early genes for activation (1, 15, 17). These  
103 findings, and decades of subsequent work elucidating the molecular and genetic details, have led  
104 to a hierarchical model of ecdysone signaling in which EcR/Usp directly induces expression of a  
105 small number of early response genes. Many of these early response genes encode transcription  
106 factors, such as the zinc finger protein Broad, the nuclear receptor Ftz-f1, and the pipsqueak  
107 domain factor E93 (2). The early response transcription factors are required, in turn, to induce  
108 expression of the late response genes, which encode proteins that impart the temporal and tissue-  
109 specific responses to ecdysone in target tissues.

110           Although the framework of the ecdysone pathway was established through work in salivary  
111 glands, additional studies have affirmed an essential role for ecdysone signaling in many other  
112 tissues. Similar to other hormones, the physiological response to ecdysone is often profoundly  
113 specific to each target tissue. For example, ecdysone signaling triggers proliferation, changes in  
114 cell and tissue morphology, and eventual differentiation of larval tissues that are fated to become  
115 part of the adult fly, such as the imaginal discs (2, 18). By contrast, ecdysone signaling initiates  
116 the wholesale elimination of obsolete tissues, such as the larval midgut and salivary glands through  
117 programmed cell death (2, 18, 19). Ecdysone also has essential functions in the nervous system



118 during metamorphosis by directing remodeling of the larval neurons that persist until adulthood,  
119 and in specifying the temporal identity of neural stem cell progeny born during this time (20).  
120 While it is clear that ecdysone signaling triggers the gene expression cascades that underlie each  
121 of these events, the molecular mechanisms by which ecdysone elicits such diverse transcriptional  
122 responses in different target tissues remains poorly understood.

123         A key step in delineating the mechanisms by which ecdysone signaling regulates target  
124 gene expression involves identification of EcR/Usp DNA binding sites. Given the hierarchical  
125 structure of the ecdysone pathway, it is unclear if EcR acts primarily at the top of the transcriptional  
126 cascade, or if it also acts directly on downstream effector genes. Several early response genes such  
127 as *br*, *Eip74EF*, and the glue genes have been shown to be directly bound by EcR *in vivo* (5, 21,  
128 22). At the genome-wide level, polytene chromosome staining revealed approximately 100 sites  
129 bound by EcR in larval salivary glands (23). DamID and ChIP-seq experiments have identified  
130 roughly 500 sites directly bound by EcR in *Drosophila* cell lines (24, 25). Thus, the available  
131 evidence, albeit limited, indicates that EcR binds to a limited number of target genes, consistent  
132 with hierarchical models wherein the response to ecdysone is largely driven by early response  
133 genes and other downstream factors.

134         We recently identified the ecdysone-induced transcription factor E93 as being essential for  
135 the proper temporal sequence of enhancer activation during pupal wing development (26). In the  
136 absence of E93, early-acting wing enhancers fail to turn off, and late-acting wing enhancers fail to  
137 turn on. Moreover, ChIP-seq identified thousands of E93 binding sites across the genome. These  
138 data support the hierarchical model of ecdysone signaling in which early response transcription  
139 factors like E93 directly regulate a significant fraction of ecdysone-responsive genes in target  
140 tissues.

141 Here, we sought to determine the role that EcR performs in temporal gene regulation during  
142 the larval-to-prepupal transition of the wing. Using wing-specific RNAi, we find that EcR is  
143 required for proper morphogenesis of prepupal wings, although it is largely dispensable for wing  
144 disc patterning at earlier stages of development. RNA-seq profiling reveals that EcR functions as  
145 both a temporal gate to prevent the precocious transition to prepupal development as well as a  
146 temporal trigger to promote progression to next stage. Using CUT&RUN, we map binding sites  
147 for EcR genome wide before and after the larval-to-prepupal transition. Remarkably, we find that  
148 EcR binds extensively throughout the genome, including at many genes with wing-specific  
149 functions that are not part of the canonical ecdysone signaling cascade. Moreover, EcR binding is  
150 highly dynamic, with thousands of binding sites gained and lost over time. Finally, transgenic  
151 reporter analyses demonstrate that EcR is required not only for temporal regulation of enhancer  
152 activity, but also for spatial regulation of target enhancers. Together, these findings indicate that  
153 EcR does not control gene expression solely through induction of a small number of downstream  
154 transcription factors, but instead it plays a direct and widespread role in regulating tissue-specific  
155 transcriptional programs.

156

## 157 **RESULTS:**

### 158 **Temporal changes in gene expression during the larval-to-prepupal transition**

159 In *Drosophila*, the end of larval development marks the beginning of metamorphosis. Over  
160 a five-day period, larval tissues are destroyed, and the progenitors of adult tissues, such as wing  
161 imaginal discs, undergo a series of progressive morphological and cell differentiation events to  
162 acquire their final shapes and sizes. By the end of larval development, the wing disc is comprised  
163 of a largely undifferentiated array of columnar epithelial cells (27, 28). The first 12 hours after

164 puparium formation (APF) is termed the prepupal stage. During this period, cell division is  
165 arrested, and the pouch of the wing disc everts outward, causing the dorsal and ventral surfaces of  
166 the wing to appose one another, forming the presumptive wing blade (**Fig 1A-B**) (27, 28). At the  
167 same time, the notum of the wing disc extends dorso-laterally, and eventually fuses with the  
168 contralateral wing disc to form the back of the adult fly (**Fig 1A-B**). Additional events occurring  
169 during this time period include secretion of the prepupal cuticle and migration of muscle progenitor  
170 cells.

171 To understand EcR's role in promoting the larval-to-prepupal transition, we began by  
172 identifying global changes in gene expression that occur in wild type wings before and after the  
173 onset of pupariation. We collected wing tissue from wandering, third instar larvae, approximately  
174 six hours prior to puparium formation (hereafter, -6hAPF) and from prepupae, approximately six  
175 hours after puparium formation (hereafter, +6hAPF), and performed RNAseq. As described  
176 previously (28), wildtype gene expression is highly dynamic during this time period. Using a  
177 conservative definition for differential expression (FDR < 0.05, >= 2-fold change in expression),  
178 we identified over 1300 genes increasing in expression and nearly 800 genes decreasing in  
179 expression (**Fig 1C**). The observed gene expression changes are consistent with developmental  
180 events occurring at this time. For example, genes that increase over time are involved in cuticle  
181 deposition, wing morphogenesis, and muscle development (**Fig 1C**). By contrast, genes that  
182 decrease over time are involved in cell cycle regulation, cellular metabolism, and neural  
183 development. Thus, the morphological changes that define the larval-to-prepupal transition are  
184 rooted in thousands of changes in gene expression.

185 **EcR is required for the larval-to-prepupal transition in wings**

186           The onset of pupariation is induced by a high titer ecdysone pulse. At the genetic level,  
187 ecdysone acts through its receptor, EcR. Null mutations in *EcR* are embryonic lethal. Therefore,  
188 to investigate the role that EcR plays in wing development, we used a wing-specific GAL4 driver  
189 in combination with an RNAi construct to knockdown EcR expression throughout wing  
190 development (29). EcR-RNAi driven in wing discs diminished protein levels by approximately  
191 95% (**Fig S1A-C**).

192           In agreement with previous work suggesting that EcR does not appear to be required for  
193 wing development during the 1<sup>st</sup> and 2<sup>nd</sup> instar stages (30–33), EcR-RNAi wings appear  
194 morphologically similar to wild type (WT) wing imaginal discs at –6hAPF (**Fig 1B**). However,  
195 EcR-RNAi wing discs are noticeably larger than WT wing discs, consistent with the proposed role  
196 for ecdysone signaling in cell cycle inhibition in 3<sup>rd</sup> instar larvae (30, 31). By contrast, EcR-RNAi  
197 wings at +6hAPF appear morphologically dissimilar to both –6hAPF EcR-RNAi wings and to WT  
198 wings at +6hAPF. The pouch fails to properly evert and larval folds remain visible. Similarly, the  
199 notum fails to extend appropriately, and appears more similar to the larval notum than the notum  
200 at +6hAPF (**Fig 1B**). These findings suggest that wings fail to properly progress through the larval-  
201 to-prepupal transition in the absence of EcR. Notably, this failure is likely not due to a systemic  
202 developmental arrest because legs isolated from larvae and pupae expressing EcR-RNAi in the  
203 wing exhibit no morphological defects (**Fig S1D**). We conclude that EcR is required tissue-  
204 autonomously for progression through the larval-to-prepupal transition.

205           To identify genes impacted by the loss of EcR, we performed RNA-seq on EcR-RNAi  
206 wings at –6hAPF and +6hAPF. Knockdown of EcR results in widespread changes in gene  
207 expression (**Fig 1D**). At –6hAPF, 453 genes are differentially expressed in EcR-RNAi wings  
208 relative to wildtype wing imaginal discs. Remarkably, 85% of these genes (n=383, “–6hAPF EcRi

209 > WT”) are expressed at higher levels in EcR-RNAi wings relative to WT, suggesting that EcR is  
210 primarily required to repress gene expression at –6hAPF. To determine the expression profiles of  
211 these genes during WT development, we performed cluster analysis (**Fig 1E**), and found that 72%  
212 of these –6hAPF EcRi UP genes normally increase in expression between –6hAPF and +6hAPF  
213 (**Fig 1E**). Genes in this category include those involved in cuticle development as well as multiple  
214 canonical ecdysone response genes (**Table S1**). Thus, a major role of EcR at –6hAPF is to keep  
215 genes involved in the prepupal program from being precociously activated during larval stages.

216 We next examined the impact of EcR knockdown in +6hAPF wings. In contrast to the  
217 effect at –6hAPF, wherein genes primarily increased in the absence of EcR, we observed  
218 approximately equal numbers of up- and down-regulated genes relative to WT wings at +6hAPF  
219 (**Fig 1F**). Clustering of EcR-RNAi and WT RNA-seq data revealed distinct differences in the  
220 inferred regulatory role of EcR at +6hAPF relative to –6hAPF (**Fig 1G**). 74% of the genes  
221 expressed at higher levels in EcR-RNAi wings relative to WT normally decrease in expression  
222 between –6hAPF and +6hAPF (**Fig 1G**). Genes in this category include factors that promote  
223 sensory organ development and metabolic genes (**Table S2**). The increased levels of these  
224 “+6hAPF EcRi > WT” genes suggest that in addition to preventing precocious activation of the  
225 prepupal gene expression program, EcR is also required to shut down the larval gene expression  
226 program. However, we also observe a role for EcR in gene activation. For genes that are expressed  
227 at lower levels in EcR-RNAi wings (n=619, “+6hAPF WT > EcRi”), 96% of these genes normally  
228 increase between –6hAPF and +6hAPF. Genes in this category include those involved in muscle  
229 development as well as regulators of cell and tissue morphology (**Table S2**). We conclude that  
230 EcR is required not only for gene repression but also for gene activation, consistent with the  
231 demonstrated interaction of EcR with both activating and repressing gene regulatory complexes

232 (7–13). Collectively, these data demonstrate that the failure of EcR-RNAi wings to progress  
233 through the larval-to-prepupal transition coincides with widespread failures in temporal gene  
234 expression changes.

### 235 **EcR directly binds thousands of sites genome-wide**

236 The experiments described above reveal that ecdysone triggers thousands of gene  
237 expression changes in wings during the larval-to-prepupal transition. Because ecdysone signaling  
238 initiates a cascade of transcription factor expression, it is unclear which of these changes are  
239 mediated directly by EcR. Therefore, we next sought to determine the genome-wide DNA binding  
240 profiles of EcR in developing wings. For these experiments, we utilized a fly strain in which the  
241 endogenous *EcR* gene product has been epitope-tagged by a transposon inserted into an intron of  
242 *EcR* (34, 35). This epitope tag is predicted to be incorporated into all EcR protein isoforms  
243 (hereafter EcR<sup>GFSTF</sup>) (**Fig S2A**). Genetic complementation tests determined that *EcR*<sup>GFSTF</sup> flies are  
244 viable at the expected frequency (**Fig S2B**), indicating that epitope-tagged EcR proteins are fully  
245 functional. Supporting this interpretation, western blotting demonstrated that EcR<sup>GFSTF</sup> protein  
246 levels are equivalent to untagged EcR, and immunofluorescence experiments revealed nuclear  
247 localization of EcR<sup>GFSTF</sup> (**Fig S2C-D**), as well as binding of EcR<sup>GFSTF</sup> to the same regions as  
248 untagged EcR on polytene chromosomes (**Fig S2E**).

249 To generate genome-wide DNA binding profiles for EcR, we performed CUT&RUN on –  
250 6hAPF wings (**Fig 2A**) from *EcR*<sup>GFSTF</sup> flies. CUT&RUN provides similar genome-wide DNA  
251 binding information for transcription factors as ChIP-seq, but requires fewer cells as input material  
252 (36, 37), making it useful for experiments with limiting amounts of tissue. Our EcR CUT&RUN  
253 data exhibit features that are similar to those previously reported for other transcription factors,  
254 including greater DNA-binding site resolution relative to ChIP-seq (**Fig S3, S5**). Wing

255 CUT&RUN profiles at –6hAPF reveal that EcR binds extensively throughout the genome (**Fig 2**).  
256 Many EcR binding sites localize to canonical ecdysone target genes, including *broad*, *Eip93F*,  
257 *Hr3*, *Hr4* and *Eip75B* (**Fig 2A**). Surprisingly, we also observed EcR binding to many genes that  
258 have not previously been categorized as ecdysone targets, including *homothorax*, *Delta*, *Actin 5C*,  
259 *Stubble* and *crossveinless c* (**Fig 2B**). Thus, EcR binds widely across the genome in wing imaginal  
260 discs. The widespread binding of EcR observed here contrasts with previous genome-wide DNA  
261 binding profiles obtained for EcR. For example, ChIP-seq profiles from S2 cells and DamID  
262 profiles from Kc167 cells identified 500-1000 binding sites (24, 25). By contrast, our findings  
263 demonstrate that EcR binds both canonical and non-canonical ecdysone-target genes, raising the  
264 question as to whether EcR directly contributes to a wing-specific transcriptional program.

265 In addition to widespread DNA binding, we also observed clustering of EcR binding sites  
266 in the genome. EcR peaks are significantly closer to one another than expected by chance (**Fig**  
267 **S4A-C**), and a majority of peaks are located within 5kb of an adjacent peak (**Fig S4D**). In  
268 particular, canonical ecdysone target genes often exhibit clusters of EcR binding (**Fig S4E-F**).  
269 These findings suggest that EcR often binds multiple *cis*-regulatory elements across target gene  
270 loci, consistent with the observed clustering of ecdysone-responsive enhancers in S2 cells (25) .

### 271 **EcR binding is temporally dynamic**

272 To understand the role of EcR binding in temporal progression of wing development, we  
273 next performed CUT&RUN on +6hAPF wings (**Fig 2, 3A**). Similar to our findings from –6hAPF  
274 wings, we found that EcR binds widely across the genome at +6hAPF. Interestingly, there is a  
275 global decrease in the number of sites occupied by EcR over time: EcR binds to a total of 4,967  
276 sites genome-wide at –6hAPF, whereas it binds 1,174 sites at +6hAPF (**Fig 3B**). While many of  
277 the +6hAPF binding sites overlap with –6hAPF binding sites (763 peaks, 65%) (hereafter –6h/+6h

278 stable binding sites), we also identified 411 sites that are specific to the +6hAPF time. Similar to  
279 -6hAPF peaks, EcR binding sites at +6hAPF peaks are clustered genome-wide (**Fig S4**). Thus, the  
280 larval-to-prepupal transition in wings is marked by both the loss of EcR from the majority of its -  
281 6hAPF binding sites, as well as the gain of EcR at hundreds of new binding sites.

282 To investigate the potential biological significance of temporally-dynamic EcR binding,  
283 we separated EcR binding sites into three categories: -6hAPF-specific, +6hAPF-specific, and -  
284 6h/+6h stable. Gene annotation enrichment analysis identified genes involved in imaginal disc-  
285 derived wing morphogenesis as the top term for each binding site category (**Table S3**), indicating  
286 that EcR may directly regulate genes involved in wing development at each of these developmental  
287 stages. Interestingly, we found that the amplitude of EcR CUT&RUN signal is greater at -6h/+6h  
288 stable binding sites relative to temporal-specific binding sites (**Fig 3C**). To investigate the potential  
289 basis for the difference in binding intensity, we examined the DNA sequence within each class of  
290 EcR binding site. Together with its DNA binding partner, Usp, EcR recognizes a canonical, 13bp  
291 palindromic motif, called an Ecdysone Response Element (EcRE), with EcR and Usp each binding  
292 to half of the motif (38, 39). *De novo* motif discovery analysis revealed the presence of this motif  
293 in each of our three peak categories (**Fig 3D**). To determine if differences in signal amplitude  
294 between -6h/+6h stable EcR binding sites could be caused by differences in motif content, we  
295 examined EcR motif density around the CUT&RUN peak summits for each of the three binding  
296 site categories. On average, we observed a positive correlation between motif density and signal  
297 amplitude, with -6hAPF temporal-specific binding sites having both the lowest motif density and  
298 the lowest signal amplitude, and -6h/+6h stable binding sites having both the highest motif density  
299 and the highest signal amplitude (**Fig 3E**). Furthermore, the average motif strength (ie. the extent  
300 to which the motif matches consensus) in -6h/+6h stable binding sites was also significantly higher



301 **(Fig 3F)**. These data are consistent with a model in which differences in motif content and strength  
302 within -6h/+6h stable peaks make EcR binding to these sites less reliant on other factors, such as  
303 other transcription factors. Conversely, the lower motif content and strength within temporal-  
304 specific peaks suggests EcR may depend more on cooperative interactions with other transcription  
305 factors to assist binding at these sites.

### 306 **EcR binding is tissue-specific**

307 The results described above indicate that EcR binds extensively across the genome,  
308 including to many genes with wing-specific function, thus raising the question as to whether EcR  
309 binding is tissue-specific. To address this question, we first examined loci that had been previously  
310 determined to contain functional EcR binding sites by *in vitro* DNA binding and *in vivo* reporter  
311 assays (22, 38, 40). Many of these sites, including the glue genes *Sgs3*, *Sgs7*, and *Sgs8*, the fat  
312 body protein *Fbp1*, and the oxidative response gene *Eip71CD*, show no evidence of EcR binding  
313 in wings (**Fig S5**), supporting the finding that EcR binds target sites in a tissue-specific manner.  
314 To examine this question more globally, we compared our wing CUT&RUN data to EcR ChIP-  
315 seq data from *Drosophila* S2 cells (**Fig 4A**) (25). Overall, a small fraction of wing EcR binding  
316 sites overlap an EcR binding site in S2 cells (**Fig 4B, C**). However, among the sites that are shared  
317 between wings and S2 cells, there is marked enrichment of overlap with -6h/+6h stable wing  
318 binding sites. Whereas only 0.1% of -6hAPF-specific binding sites (41 peaks) and 2% of +6hAPF-  
319 specific binding sites (9 peaks) overlap an S2 cell EcR binding site, 16% of -6h/+6h stable binding  
320 sites (122 peaks) overlap an S2 cell EcR binding site. Thus, binding sites to which EcR is stably  
321 bound over time in developing wings are more likely to be shared with EcR binding sites in other  
322 cell types, relative to temporal-specific EcR binding sites in the wing.

323 To investigate potential differences in target gene function between wing-specific binding  
324 sites and those shared with S2 cells, we performed gene annotation enrichment analysis on genes  
325 near EcR binding sites. This analysis revealed steroid hormone-mediated signaling pathway as the  
326 most significant term for genes overlapping an EcR peak in both wings and S2 cells (**Fig 4D**).  
327 Genes annotated with this term include canonical ecdysone-responsive genes, such as *Eip78C*,  
328 *Hr39* and *EcR* itself. By contrast, imaginal disc-derived wing morphogenesis was identified as the  
329 top term for genes near wing-specific EcR binding sites, similar to our findings from above. These  
330 data indicate that EcR binding sites that are shared by wings and S2 cells tend to occur at canonical  
331 ecdysone target genes, whereas wing-specific EcR binding sites tend to occur at genes with wing-  
332 specific functions. Together, these data suggest EcR plays a direct role in mediating the distinct  
333 gene expression responses to ecdysone exhibited by different cell types (41).

### 334 **EcR regulates the temporal activity of an enhancer for *broad*, a canonical ecdysone target** 335 **gene**

336 The results described above indicate that EcR binds to both canonical and non-canonical  
337 ecdysone target genes in the wing, and that EcR is required for temporal progression of wing  
338 transcriptional programs. We next sought to examine the relationship between EcR binding in the  
339 genome and regulation of gene expression. Because EcR both activates and represses target gene  
340 expression, we grouped all differentially expressed genes together and counted the proportion of  
341 genes that overlap an EcR binding cluster (**Fig S6A-C**). We observed an enrichment of EcR  
342 binding sites near genes that are differentially expressed in EcR-RNAi wing at both -6hAPF and  
343 +6hAPF and a depletion of EcR binding sites near genes that are either temporally static or not  
344 expressed (**Fig S6A-C**). These correlations support a direct role for EcR in regulating temporal  
345 changes in gene expression during the larval-to-prepupal transition.

346 To obtain a more direct readout of EcR's role in target gene regulation, we investigated  
347 whether EcR binding contributes to control of enhancer activity. We first examined the potential  
348 regulation of a canonical ecdysone target gene. The *broad complex* (*br*) encodes a family of  
349 transcription factors that are required for the larval-to-prepupal transition in wings and other tissues  
350 (**Fig 5A**) (42, 43). *Br* has been characterized as a canonical ecdysone target gene that is induced  
351 early in the transcriptional response upon release of hormone (42, 44, 45). In wing imaginal discs,  
352 Br protein levels are uniformly low in early 3<sup>rd</sup> instar larvae, and by late 3<sup>rd</sup> instar, Br levels have  
353 increased (**Fig S7A**). Ecdysone signaling has been proposed to contribute to this increase in Br  
354 expression in wings over time (30, 31).

355 Our CUT&RUN data identify multiple EcR binding sites across the *br* locus at both –  
356 6hAPF and +6hAPF (**Fig 5A**). One of these binding sites corresponds to an enhancer (*br<sup>disc</sup>*) we  
357 previously identified that recapitulates *br* activity in the wing epithelium at –6hAPF (26).  
358 Consistent with the observed increase in Br protein levels during 3<sup>rd</sup> instar wing development, the  
359 activity of *br<sup>disc</sup>* increases with time (**Fig 5B**). To investigate the potential role of EcR in controlling  
360 the activity of *br<sup>disc</sup>*, we ectopically expressed a mutated isoform of EcR that functions as a  
361 constitutive repressor (EcR<sup>DN</sup>). EcR<sup>DN</sup> expression in the anterior compartment of the wing results  
362 in decreased *br<sup>disc</sup>* activity in both early and late stage wing discs (**Fig 5C**), indicating that EcR<sup>DN</sup>  
363 represses *br<sup>disc</sup>*. We further examined the role of EcR in regulating *br<sup>disc</sup>* by knocking down EcR  
364 via RNAi, which would eliminate both activating and repressing functions of EcR. EcR  
365 knockdown resulted in a modest increase in the activity of *br<sup>disc</sup>* in early wing discs compared to  
366 WT wings (**Fig 5D-E**), demonstrating that EcR is required to repress *br<sup>disc</sup>* at this stage. We also  
367 observed a slight increase in *br<sup>disc</sup>* activity in late wing discs (**Fig 5D-E**). Together, these findings  
368 indicate that EcR is required to keep *br<sup>disc</sup>* activity low in early 3<sup>rd</sup> instar wing discs, but it is not

369 required for *br<sup>disc</sup>* activation in late 3<sup>rd</sup> instar wing discs. Additionally, the observation that *br<sup>disc</sup>* is  
370 active in the absence of EcR, and continues to increase in activity over time, suggests that *br*  
371 requires other unknown activators which themselves may be temporally dynamic. Because the  
372 levels of Br increase with time, we conclude that release of repression by EcR functions as a  
373 temporal switch to control Br expression during the larval-to-prepupal transition.

#### 374 **EcR binds to enhancers with spatially-restricted activity patterns in the wing**

375 EcR's role in controlling the timing of *br* transcription through the *br<sup>disc</sup>* enhancer supports  
376 conventional models of ecdysone signaling in coordinating temporal gene expression. To  
377 determine whether EcR plays a similar role at non-canonical ecdysone target genes, we focused  
378 on the *Delta (Dl)* gene, which encodes the ligand for the Notch (N) receptor. Notch-Delta signaling  
379 is required for multiple cell fate decisions in the wing (46–48). In late third instar wing discs, Dl  
380 is expressed at high levels in cells adjacent to the dorsal-ventral boundary, along each of the four  
381 presumptive wing veins, and in proneural clusters throughout the wing (49). Remarkably, despite  
382 the requirement of Notch-Delta signaling in each of these areas, no enhancers active in wing discs  
383 have been described for the *Dl* gene. The *Dl* locus contains multiple sites of EcR binding (**Fig 6A**).  
384 Using open chromatin data from wing imaginal discs to identify potential *Dl* enhancers (50), we  
385 cloned two EcR-bound regions for use in transgenic reporter assays. The first of these enhancers  
386 exhibits a spatially-restricted activity pattern in late third instar wing discs that is highly  
387 reminiscent of sensory organ precursors (SOPs) (**Fig 6B**). Immunostaining for the proneural factor  
388 Achaete (Ac) revealed that cells in which this *Dl* enhancer is active co-localize with proneural  
389 clusters (**Fig 6B**). Immunostaining also confirmed these cells express Dl (**Fig 6C**). We therefore  
390 refer to this enhancer as *Dl<sup>SOP</sup>*. Notably, using *Dl<sup>SOP</sup>* to drive expression of a destabilized GFP  
391 reporter, its activity pattern refines from a cluster of cells to a single cell (**Fig 6C**), consistent with

392 models of SOP specification in which feedback loops between *N* and *Dl* result in high levels of *N*  
393 signaling in the cells surrounding the SOP, and high levels of *Dl* expression in the SOP itself. By  
394 +6hAPF, the pattern of *Dl*<sup>SOP</sup> activity does not change, and it remains spatially restricted to cells  
395 along the D/V boundary and proneural clusters in the notum. The second *Dl* enhancer bound by  
396 EcR is also active in late 3<sup>rd</sup> instar wing discs (**Fig 6A**). This enhancer is most strongly active in  
397 *Dl*-expressing cells of the tegula, lateral notum, and hinge (**Fig 6D-E**) (51). In the pouch, it is  
398 active in cells that comprise the L3 and L4 proveins, which require *Dl* for proper development (47)  
399 although overlap with *Dl* in each of these regions is less precise (**Fig 6D-E**). We refer to this  
400 enhancer as *Dl*<sup>leg</sup>. Collectively, these data demonstrate that, in contrast to the widespread activity  
401 of *br*<sup>disc</sup>, the EcR-bound enhancers in the *Dl* locus exhibit spatially-restricted activity, raising the  
402 possibility that EcR binding may serve a different function at these binding sites.

#### 403 ***Ultraspiracle* clones display changes in the spatial pattern of enhancer activity**

404 We next sought to determine if EcR regulates the activity of these enhancers. Since the *Dl*  
405 enhancers drive GAL4 expression, we could not use the EcR<sup>DN</sup> and EcR-RNAi lines employed  
406 above. Therefore, we generated loss of function clones of *Usp*, the DNA binding partner of EcR.  
407 Clones of *usp* were induced at 48-60 hours and enhancer activity was assayed at -6hAPF.  
408 Surprisingly, *usp* loss of function results in an increased number of cells in which *Dl*<sup>SOP</sup> is active  
409 in the pouch of wing discs (**Fig 6F, inset i**), suggesting that EcR/*Usp* are required to repress *Dl*<sup>SOP</sup>  
410 activation. Notably, clones of *usp* in other regions of the wing (**Fig 6F, inset ii**) do not activate  
411 *Dl*<sup>SOP</sup>, indicating that EcR/*Usp* are not necessary for repression of *Dl*<sup>SOP</sup> in all cells of the wing.  
412 We also note that regions exhibiting ectopic *Dl*<sup>SOP</sup> activity in *usp* clones tend to be near regions of  
413 existing *Dl*<sup>SOP</sup> activity, suggesting that localized activating inputs are required to switch the *Dl*<sup>SOP</sup>  
414 enhancer on, and that EcR/*Usp* binding to *Dl*<sup>SOP</sup> acts as a countervailing force to restrict its

415 activation to certain cells within these regions. Because the pattern of  $Dl^{SOP}$  activity does not  
416 expand between -6hAPF and +6hAPF in WT wings, the ectopic activation of this enhancer in *usp*  
417 clones supports the conclusion that EcR/Usp regulate the spatial pattern of  $Dl^{SOP}$  activation rather  
418 than its temporal activity pattern, as in the case of the  $br^{disc}$  enhancer.

419 We observed a similar effect of *usp* loss of function on activity of the  $Dl^{leg}$  enhancer.  $Dl^{leg}$   
420 activity expands in *usp* clones adjacent to regions in which  $Dl^{leg}$  is active in WT cells (**Fig 6F**). As  
421 with  $Dl^{SOP}$ , however, loss of *usp* function does not appear to be sufficient to cause ectopic  $Dl^{leg}$   
422 activity, as clones that are not adjacent to existing  $Dl^{leg}$  activity do not ectopically activate the  
423 enhancer. Notably, we did not observe expanded expression of Ac within *usp* clones, suggesting  
424 that the expanded activity pattern of the clones is not due to an expanded proneural domain (**Fig**  
425 **S8**). These results suggest that EcR primarily functions to repress these enhancers at -6hAPF in  
426 order to spatially restrict their activity. The observation that *usp* loss of function is not sufficient  
427 to cause ectopic enhancer activity may be because the activation of these enhancers requires other  
428 inputs.

## 429 **DISCUSSION:**

430 Decades of work have established the central role that ecdysone signaling, acting through  
431 its nuclear receptor, EcR, plays in promoting developmental transitions in insects. In this study,  
432 we investigate the genome-wide role of EcR during the larval-to-prepupal transition in *Drosophila*  
433 wings. Our findings validate existing models of ecdysone pathway function, and they extend  
434 understanding of the direct role played by EcR in coordinating dynamic gene expression programs.

435 **The role of EcR in promoting gene expression changes during developmental transitions**

436 Our RNA-seq data reveal that EcR controls the larval-to-preupal transition by activating  
437 and repressing distinct sets of target genes. In larval wing imaginal discs, we find that EcR is  
438 primarily required to prevent precocious activation of the prepupal gene expression program. This  
439 finding is consistent with previous work which demonstrated precocious differentiation of sensory  
440 neurons in the absence of ecdysone receptor function (33). Since ecdysone titers remain low during  
441 most of the 3<sup>rd</sup> larval instar, these data are also consistent with prior work which demonstrated that  
442 EcR functions as a transcriptional repressor in the absence of hormone (6, 38). Later in prepupal  
443 wings, we find that EcR loss of function results in failure to activate the prepupal gene expression  
444 program. Indeed, many of the genes that become precociously activated in wing discs fail to reach  
445 their maximum level in prepupae. Since rising ecdysone titers at the end of 3<sup>rd</sup> larval instar trigger  
446 the transition to the prepupal stage, this finding is consistent with a hormone-induced switch in  
447 EcR from a repressor to an activator (6, 38). We also find that EcR loss of function results in  
448 persistent activation of the larval gene expression program in prepupal wings. This finding is not  
449 clearly explained by a hormone-induced switch in EcR's regulatory activity. However, it is  
450 possible that EcR activates a downstream transcription factor, which then represses genes involved  
451 in larval wing development. Overall, these findings indicate that EcR functions both as a temporal  
452 gate to ensure accurate timing of the larval-to-preupal transition and as a temporal switch to  
453 simultaneously shut down the preceding developmental program and initiate the subsequent  
454 program. Finally, it is of particular note that these genome-wide results fit remarkably well with  
455 the model of ecdysone pathway function predicted by Ashburner forty-five years ago (52).

## 456 **Widespread binding of EcR across the genome**

457 Existing models describe EcR as functioning at the top of a transcriptional cascade, in  
458 which it binds to a relatively small number of canonical ecdysone-response genes. These factors  
459 then activate the many downstream effectors that mediate the physiological response to ecdysone.  
460 Consistent with this model, attempts to assay EcR binding genome-wide in S2 cells and Kc167  
461 cells have identified relatively few EcR binding sites (24, 25). However, this model does not  
462 adequately explain how ecdysone elicits distinct transcriptional responses from different target  
463 tissues. Our data reveal that EcR binds to thousands of sites genome-wide. While many of the  
464 genes that exhibit EcR binding sites have previously been identified as direct targets of EcR in  
465 salivary glands and others tissues, the majority of EcR binding events we observe occur near genes  
466 with essential roles in wing development. These data support a model in which EcR directly  
467 mediates the response to ecdysone both at the top of the hierarchy and at many of the downstream  
468 effectors. Interestingly, comparison of our wing DNA-binding profiles with ChIP-seq data from  
469 S2 cells revealed that shared EcR binding sites are enriched in canonical ecdysone-response genes,  
470 suggesting that the top tier of genes in the ecdysone hierarchy are direct targets of EcR across  
471 multiple tissues, while the downstream effectors are direct EcR targets only in specific tissues.  
472 These data neatly account for the observation that parts of the canonical ecdysone transcriptional  
473 response are shared between tissues, even as many other responses are tissue-specific. It will be  
474 important to identify the factors that contribute to EcR's tissue-specific DNA targeting in future  
475 work. It is possible that tissue-specific transcription factors facilitate EcR binding across the  
476 genome, as suggested by recent DNA-binding motif analysis of ecdysone-responsive enhancers in  
477 S2 and OSC cell lines (25). Alternatively, tissue-specific epigenetic marks such as histone  
478 modifications may influence EcR binding to DNA.



## 479 **Temporally-dynamic binding of EcR**

480 Pulses of ecdysone mediate different transcriptional responses at different times in  
481 development. Some of this temporal-specificity has been shown to be mediated by the sequential  
482 activation of transcription factors that form the core of the ecdysone cascade (53–55). Our data  
483 suggest that changes in EcR binding may also be involved. We find that EcR binding is highly  
484 dynamic over time; a subset of its binding sites is unique to each time point. The mechanisms  
485 responsible for changes in EcR binding over time remain unclear. One possibility is that ecdysone  
486 titers impact EcR DNA binding. This could occur through ligand-dependent changes in EcR  
487 structure or through ligand-dependent interactions with co-activator and co-repressor proteins that  
488 influence EcR's DNA binding properties. An alternative possibility is that the nuclear-to-  
489 cytoplasmic ratio of EcR changes with time, as has been previously proposed (56, 57). While  
490 nuclear export of EcR could explain the global reduction in the number of EcR binding sites  
491 between –6hAPF and +6hAPF, it cannot explain the appearance of new EcR binding sites at  
492 +6hAPF. For this reason, it is notable that temporal-specific binding sites contain lower motif  
493 content on average relative to EcR binding sites that are stable between –6hAPF and +6hAPF.  
494 This suggests that temporal-specific binding may be more dependent on external factors. An  
495 intriguing possibility is that stage-specific transcription factors activated as part of the canonical  
496 ecdysone cascade may contribute to recruitment or inhibition of EcR binding at temporal-specific  
497 sites.

## 498 **EcR controls both temporal and spatial patterns of gene expression.**

499 EcR has been shown to act as both a transcriptional activator and a repressor. This dual  
500 functionality confounded our attempts to draw genome-wide correlations between EcR binding  
501 and changes in gene expression. Therefore, we sought to determine the effect of EcR binding by

502 examining individual target enhancers. We find that EcR regulates the temporal activity of an  
503 enhancer for the canonical early-response target gene, *br*. In wild type wings, the activity of this  
504 enhancer increases between early and late third instar stages, as do Br protein levels. Ectopic  
505 expression of a dominant-repressor isoform of EcR decreased activity of *br<sup>disc</sup>*. Surprisingly,  
506 RNAi-mediated knockdown of EcR increased *br<sup>disc</sup>* activity, indicating that EcR is not required for  
507 *br<sup>disc</sup>* activation. Instead, these findings indicate that EcR represses *br<sup>disc</sup>* in early third instar wings,  
508 consistent with our RNA-seq data which demonstrated that EcR prevents precocious activation of  
509 the prepupal gene expression program prior to the developmental transition. It is not known what  
510 factors activate *br* or the other prepupal genes.

511 Temporal control of gene expression by EcR is expected given its role in governing  
512 developmental transitions. However, our examination of EcR-bound enhancers from the *Dl* locus  
513 demonstrates that it also directly controls spatial patterns of gene expression. Loss-of-function  
514 clones for EcR's DNA binding partner Usp exhibited ectopic activation of two *Dl* enhancers.  
515 However, we did not detect ectopic enhancer activity in all *usp* mutant clones, indicating that EcR  
516 is required to restrict activity of target enhancers only at certain locations within the wing.  
517 Examination of +6hAPF wings revealed no changes in the spatial pattern of *Dl* enhancer activity  
518 relative to -6hAPF, indicating that ectopic enhancer activation in *usp* clones does not reflect  
519 incipient changes in enhancer activity. Recently, EcR binding sites were shown to overlap with  
520 those for the *Notch* regulator, Hairless, supporting a potential role of EcR in regulating spatial  
521 patterns of gene expression. (59). We conclude that EcR regulates both temporal and spatial  
522 patterns of gene expression. Given the widespread binding of EcR across the genome, our findings  
523 suggest that EcR plays a direct role in temporal and spatial patterning of many genes in  
524 development.

525           Hormones and other small molecules act through nuclear receptors to initiate  
526 transcriptional cascades that often continue for extended periods of time. For example, thyroid  
527 hormone triggers metamorphosis in frogs and other chordates, a process that can take weeks for  
528 completion (60). Our work raises the possibility that nuclear receptors play an extensive and direct  
529 role in regulating activity of downstream response genes. In particular, the widespread and  
530 temporally-dynamic binding of EcR that we observed over a short interval of wing development  
531 suggests that the complete repertoire of EcR targets is vastly larger than previously appreciated.

532

## 533 **METHODS:**

### 534 **Western Blots**

535 For each sample, 40 wings were lysed directly in Laemmli sample buffer preheated to 95C. The  
536 following antibody concentrations were used to probe blots: 1:1000 mouse anti-EcR (DSHB  
537 DDA2.7, concentrate); 1:5000 rabbit anti-GFP (Abcam ab290); 1:30000 mouse anti-alpha Tubulin  
538 (Sigma T6074); 1:5000 goat anti-mouse IgG, HRP-conjugated (Fisher 31430); 1:5000 donkey  
539 anti-rabbit, HRP-conjugated (GE Healthcare NA934).

### 540 **Transgenic Reporter Construction**

541 Candidate enhancers were cloned into the pΦUGG destination vector (61) [and](#) integrated into the  
542 attP2 site. Primer sequences are available upon request.

### 543 **Immunofluorescence**

544 Immunostaining was performed as described previously ([50](#)). For mitotic clones, *usp3 FRT19A /*  
545 *Ubi-RFP, hs-FLP, FRT19A; Enhancer-GAL4 / UAS-dsGFP* animals were heat-shocked at 24-  
546 48hrs AEL. The following antibody concentrations were used: 1:750 mouse anti-EcR, 1:4000

547 rabbit anti-GFP, 1:3500 mouse anti-DI (DSHB C594.9b, concentrate), 1:200 mouse anti-FLAG  
548 M2 (Sigma F1804), 1:10 mouse anti-Achaete (DSHB anti-achaete, supernatant).

#### 549 **Sample preparation for RNAseq**

550 A minimum of 60 wings were prepared as previously described (McKay and Lieb, 2013) from  
551 either *Oregon R* (WT) or *yw; vg-GAL4, tub>CD2>GAL4, UAS-GFP, UAS-FLP / UAS-EcR-*  
552 *RNAi<sup>104</sup>* (EcR-RNAi). For library construction, 50-100ng RNA was used as input to the Ovation  
553 *Drosophila* RNA-Seq System. Single-end, 1x50 sequencing was performed on an Illumina HiSeq  
554 2500 at the UNC High Throughput Sequencing Facility.

#### 555 **Sample preparation for CUT&RUN**

556 A minimum of 100 wings from *w; EcR<sup>GFSTF</sup>/Df(2R)BSC313* were dissected in 1XPBS. Samples  
557 were centrifuged at 800rcf for 5minutes at 4C and washed twice with dig-wash buffer (20mM  
558 HEPES-NaOH, 150mM NaCl, 2mM EDTA, 0.5mM Spermidine, 10mM PMSF, 0.05% digitonin)  
559 and incubated in primary antibody for 2hrs at 4C. Samples were washed as before and incubated  
560 in secondary antibody for 2hrs. Samples were washed and incubated for 1hr with proteinA MNase.  
561 Samples were washed twice in dig-wash buffer without EDTA and then resuspended in 150uL  
562 dig-wash buffer without EDTA. Following this, samples were equilibrated to 0C in an ice bath.  
563 2uL CaCl<sub>2</sub> (100mM) was added to activate MNase and digestion allowed to proceed for 45s before  
564 treating with 150uL 2XRSTOP+ buffer (200mM NaCl, 20mM EDTA, 4mM EGTA, 50ug/ml  
565 RNase, 40ug/ml glycogen, 2pg/ml yeast spike-in DNA). Soluble fragments were released by  
566 incubating at 37C for 10m. Samples were spun twice at 800g, 5m at 4C and the aqueous phase  
567 removed. The rest of the protocol was performed as described in Skene et al., 2018. For library  
568 preparation, the Rubicon ThruPLEX 12s DNA-seq kit was used following the manufacturer's  
569 protocol until the amplification step. For amplification, after the addition of indexes, 16-21 cycles

570 of 98C, 20s; 67C, 10s were run. A 1.2x SPRI bead cleanup was performed (Agencourt Ampure  
571 XP). Libraries were sequenced on an Illumina MiSeq. The following antibody concentrations were  
572 used: 1:300 mouse anti-FLAG M2; 1:200 rabbit anti-Mouse (Abcam ab46450); 1:400 Batch#6  
573 proteinA-MNase (from Steven Henikoff).

#### 574 **RNA Sequencing Analysis**

575 Reads were aligned with STAR (2.5.1b) (62). Indexes for STAR were generated with parameter -  
576 -sjdbOverhang 49 using genome files for the dm3 reference genome. The STAR aligner was run  
577 with parameters --alignIntronMax 50000 --alignMatesGapMax 50000. Subread (v1.24.2) was used  
578 to count reads mapping to features (63). DESeq2 (v1.14.1) was used to identify differentially  
579 expressed genes using the lfcShrink function to shrink log-fold changes (64). Differentially  
580 expressed genes were defined as genes with an adjusted p-value less than 0.05 and a log2 fold  
581 change greater than 2. Normalized counts were generated using the counts function in DESeq2.  
582 For k-medoids clustering, normalized counts were first converted into the fraction of maximum  
583 WT counts and clustering was performed using the cluster package in R. Optimal cluster number  
584 was determined by minimizing the cluster silhouette. Heatmaps were generated using pheatmap  
585 (v1.0.10) in R. Gene Ontology analysis was performed using Bioconductor packages TopGO  
586 (v2.26.0) and GenomicFeatures (v1.26.4) (65, 66).

#### 587 **CUT&RUN Sequencing Analysis**

588 Technical replicates were merged by concatenating fastq files. Reads were trimmed using bbmap  
589 (v37.50) with parameters ktrim=4 ref=adapters rcomp=t tpe=t tbo=t hdist=1 mink=11. Trimmed  
590 reads were aligned to the dm3 reference genome using Bowtie2 (v2.2.8) with parameters --local -  
591 -very-sensitive-local --no-unal --no-mixed --no-discordant --phred33 -I 10 -X 700 (67). Reads with  
592 a quality score less than 5 were removed with samtools (v1.3.1) (68). PCR duplicates were marked

593 with Picard (v2.2.4) and then removed with samtools. Bam files were converted to bed files with  
594 bedtools (v2.25.0) with parameter -bedpe and split into different fragment size categories using  
595 awk (69). Bedgraphs were generated with bedtools and then converted into bigwigs with ucsc tools  
596 (v320) (70). Data was z-normalized using a custom R script. MACS (v2016-02-15) was used to  
597 call peaks on individual replicates and merged files using a control genomic DNA file from  
598 sonicated genomic DNA using parameters -g 121400000 --nomodel --seed 123 (71). A final peak  
599 set was obtained by using peaks that were called in the merged file that overlapped with a peak  
600 called in at least one replicate. Heatmaps and average signal plots were generated from z-  
601 normalized data using the Bioconductor package Seqplots (v1.18.0). ChIPpeakAnno (v3.14.0) was  
602 used to calculate distance of peaks to their nearest gene (72, 73). Gene ontology analysis was  
603 performed as described above.

#### 604 **Motif Analysis**

605 *De novo* motif analysis was performed using DREME (v4.12.0) using parameters -maxk 13 -t  
606 18000 -e 0.05 (74). As background sequences, FAIRE peaks from -6hAPF or +6hAPF were  
607 used. To identify occurrences of the EcR motif in the genome, a PWM for the canonical EcR motif  
608 was generated with the iupac2meme tool using the IUPAC motif “RGKTCAWTGAMCY” and  
609 then FIMO (v4.12.0) was run on the dm3 reference genome using parameters --max-stored-scores  
610 10000000 --max-strand --no-qvalue --parse-genomic-coord --verbosity 4 --thresh 0.01 (75). Motif  
611 density plots were generated by counting the number of motifs from peak summits (10bp bins) and  
612 normalizing by the number of input peaks.

#### 613 **Drosophila culture and genetics**

614 Flies were grown at 25C under standard culture conditions. Late wandering larvae were used as  
615 the -6hAPF timepoint. White prepupae were used as the 0h time point for staging +6hAPF

616 animals. For 96hAEL, apple juice plates with embryos were cleared of any larvae and then four  
617 hours later any animals that had hatched were transferred to vials. The following genotypes were  
618 used:

619 *yw; vg-GAL4, UAS-FLP, UAS-GFP, Tub>CD2>GAL4 / CyO* (76)

620 *w<sup>1118</sup>; P{UAS-EcR-RNAi}104* (BDSC#9327)

621 *yw; EcR<sup>GFSTF</sup>* (BDSC#59823)

622 *w<sup>1118</sup>; Df(2R)BSC313/CyO* (BDSC#24339)

623 *UAS-dsGFP* (gift of Brian McCabe)

624 *usp3, w\*, P{neoFRT}19A/FM7c* (BDSC#64295)

625 *P{Ubi-mRFP.nls}1, w\*, P{hsFLP}12 P{neoFRT}19A* (BDSC#31418)

626

## 627 **ACKNOWLEDGEMENTS:**

628 We thank Peter J. Skene and Steven Henikoff for reagents and advice on the CUT&RUN protocol.  
629 Stocks obtained from the Bloomington Drosophila Stock Center (NIH P40OD018537) were used  
630 in this study. CMU was supported in part by NIH grant T32GM007092. This work was supported  
631 in part by Research Scholar Grant RSG-17-164-01-DDC to DJM from the American Cancer  
632 Society, and in part by grant R35GM128851 to DJM from the National Institute of General  
633 Medical Sciences of the NIH (<https://www.nigms.nih.gov/>).

634

## 635 **REFERENCES:**

636 1. Thummel CS (2001) Molecular mechanisms of developmental timing in *C. elegans* and *Drosophila*.  
637 *Dev Cell* 1(4):453–465.

- 638 2. Yamanaka N, Rewitz KF, O'Connor MB (2013) Ecdysone Control of Developmental Transitions:  
639 Lessons from Drosophila Research. *Annu Rev Entomol* 58:497–516.
- 640 3. Koelle MR, et al. (1991) The Drosophila EcR gene encodes an ecdysone receptor, a new member of  
641 the steroid receptor superfamily. *Cell* 67(1):59–77.
- 642 4. Thomas HE, Stunnenberg HG, Stewart AF (1993) Heterodimerization of the Drosophila ecdysone  
643 receptor with retinoid X receptor and ultraspiracle. *Nature* 362(6419):471–475.
- 644 5. Yao TP, et al. (1993) Functional ecdysone receptor is the product of EcR and Ultraspiracle genes.  
645 *Nature* 366(6454):476–479.
- 646 6. Dobens L, Rudolph K, Berger EM (1991) Ecdysterone regulatory elements function as both  
647 transcriptional activators and repressors. *Mol Cell Biol* 11(4):1846–1853.
- 648 7. Tsai C-C, Kao H-Y, Yao T-P, McKeown M, Evans RM (1999) SMRTER, a Drosophila Nuclear  
649 Receptor Coregulator, Reveals that EcR-Mediated Repression Is Critical for Development.  
650 *Molecular Cell* 4(2):175–186.
- 651 8. Badenhorst P, et al. (2005) The Drosophila nucleosome remodeling factor NURF is required for  
652 Ecdysteroid signaling and metamorphosis. *Genes Dev* 19(21):2540–2545.
- 653 9. Carbonell A, Mazo A, Serras F, Corominas M (2013) Ash2 acts as an ecdysone receptor coactivator  
654 by stabilizing the histone methyltransferase Trr. *Mol Biol Cell* 24(3):361–372.
- 655 10. Huang Y-C, Lu Y-N, Wu J-T, Chien C-T, Pi H (2014) The COP9 signalosome converts temporal  
656 hormone signaling to spatial restriction on neural competence. *PLoS Genet* 10(11):e1004760.
- 657 11. Kimura S, et al. (2008) Drosophila arginine methyltransferase 1 (DART1) is an ecdysone receptor  
658 co-repressor. *Biochem Biophys Res Commun* 371(4):889–893.
- 659 12. Kreher J, et al. (2017) EcR recruits dMi-2 and increases efficiency of dMi-2-mediated remodelling  
660 to constrain transcription of hormone-regulated genes. *Nat Commun* 8:14806.
- 661 13. Zhu J, Chen L, Sun G, Raikhel AS (2006) The Competence Factor  $\beta$ Ftz-F1 Potentiates Ecdysone  
662 Receptor Activity via Recruiting a p160/SRC Coactivator. *Mol Cell Biol* 26(24):9402–9412.
- 663 14. Ashburner M (1972) Patterns of puffing activity in the salivary gland chromosomes of Drosophila.  
664 VI. Induction by ecdysone in salivary glands of *D. melanogaster* cultured in vitro. *Chromosoma*  
665 38(3):255–281.
- 666 15. Ashburner M (1974) Sequential gene activation by ecdysone in polytene chromosomes of  
667 *Drosophila melanogaster*. II. The effects of inhibitors of protein synthesis. *Dev Biol* 39(1):141–157.
- 668 16. Ashburner M, Richards G (1976) Sequential gene activation by ecdysone in polytene chromosomes  
669 of *Drosophila melanogaster*. III. Consequences of ecdysone withdrawal. *Dev Biol* 54(2):241–255.
- 670 17. Karim FD, Thummel CS (1992) Temporal coordination of regulatory gene expression by the steroid  
671 hormone ecdysone. *EMBO J* 11(11):4083–4093.
- 672 18. Talbot WS, Swyryd EA, Hogness DS (1993) Drosophila tissues with different metamorphic  
673 responses to ecdysone express different ecdysone receptor isoforms. *Cell* 73(7):1323–1337.



- 674 19. Yin VP, Thummel CS (2004) A balance between the diap1 death inhibitor and reaper and hid death  
675 inducers controls steroid-triggered cell death in *Drosophila*. *Proc Natl Acad Sci U S A*  
676 101(21):8022–8027.
- 677 20. Syed MH, Mark B, Doe CQ (2017) Steroid hormone induction of temporal gene expression in  
678 *Drosophila* brain neuroblasts generates neuronal and glial diversity. *Elife* 6.  
679 doi:10.7554/eLife.26287.
- 680 21. Hitrik A, et al. (2016) Combgap Promotes Ovarian Niche Development and Chromatin Association  
681 of EcR-Binding Regions in BR-C. *PLoS Genet* 12(11):e1006330.
- 682 22. Lehmann M, Wattler F, Korge G (1997) Two new regulatory elements controlling the *Drosophila*  
683 Sgs-3 gene are potential ecdysone receptor and fork head binding sites. *Mech Dev* 62(1):15–27.
- 684 23. Fisk GJ, Thummel CS (1998) The DHR78 nuclear receptor is required for ecdysteroid signaling  
685 during the onset of *Drosophila* metamorphosis. *Cell* 93(4):543–555.
- 686 24. Gauhar Z, et al. (2009) Genomic mapping of binding regions for the Ecdysone receptor protein  
687 complex. *Genome Res* 19(6):1006–1013.
- 688 25. Shlyueva D, et al. (2014) Hormone-responsive enhancer-activity maps reveal predictive motifs,  
689 indirect repression, and targeting of closed chromatin. *Mol Cell* 54(1):180–192.
- 690 26. Uyehara CM, et al. (2017) Hormone-dependent control of developmental timing through regulation  
691 of chromatin accessibility. *Genes Dev*. doi:10.1101/gad.298182.117.
- 692 27. Fristrom D, Wilcox M, Fristrom J (1993) The distribution of PS integrins, laminin A and F-actin  
693 during key stages in *Drosophila* wing development. *Development* 117(2):509–523.
- 694 28. Guo Y, Flegel K, Kumar J, McKay DJ, Buttitta LA (2016) Ecdysone signaling induces two phases  
695 of cell cycle exit in *Drosophila* cells. *Biology Open* 5(11):1648–1661.
- 696 29. Colombani J, et al. (2005) Antagonistic Actions of Ecdysone and Insulins Determine Final Size in  
697 *Drosophila*. *Science* 310(5748):667–670.
- 698 30. Herboso L, et al. (2015) Ecdysone promotes growth of imaginal discs through the regulation of  
699 Thor in *D. melanogaster*. *Sci Rep* 5:12383.
- 700 31. Mirth CK, Truman JW, Riddiford LM (2009) The Ecdysone receptor controls the post-critical  
701 weight switch to nutrition-independent differentiation in *Drosophila* wing imaginal discs.  
702 *Development* 136(14):2345–2353.
- 703 32. Mitchell NC, et al. (2013) The Ecdysone receptor constrains wingless expression to pattern cell  
704 cycle across the *Drosophila* wing margin in a Cyclin B-dependent manner. *BMC Dev Biol* 13:28.
- 705 33. Schubiger M, Carre C, Antoniewski C, Truman JW (2005) Ligand-dependent de-repression via  
706 EcR/USP acts as a gate to coordinate the differentiation of sensory neurons in the *Drosophila* wing.  
707 *Development* 132(23):5239–5248.
- 708 34. Nagarkar-Jaiswal S, et al. (2015) A genetic toolkit for tagging intronic MiMIC containing genes.  
709 *eLife* 4:e08469.

- 710 35. Nagarkar-Jaiswal S, et al. (2015) A library of MiMICs allows tagging of genes and reversible,  
711 spatial and temporal knockdown of proteins in *Drosophila*. *eLife* 4:e05338.
- 712 36. Skene PJ, Henikoff S (2017) An efficient targeted nuclease strategy for high-resolution mapping of  
713 DNA binding sites. *Elife* 6. doi:10.7554/eLife.21856.
- 714 37. Skene PJ, Henikoff JG, Henikoff S (2018) Targeted in situ genome-wide profiling with high  
715 efficiency for low cell numbers. *Nat Protoc* 13(5):1006–1019.
- 716 38. Cherbas L, Lee K, Cherbas P (1991) Identification of ecdysone response elements by analysis of the  
717 *Drosophila* Eip28/29 gene. *Genes Dev* 5(1):120–131.
- 718 39. Riddihough G, Pelham HRB (1987) An ecdysone response element in the *Drosophila* hsp27  
719 promoter. *EMBO J* 6(12):3729–3734.
- 720 40. Antoniewski C, Laval M, Dahan A, Lepesant JA (1994) The ecdysone response enhancer of the  
721 Fbp1 gene of *Drosophila melanogaster* is a direct target for the EcR/USP nuclear receptor. *Mol Cell*  
722 *Biol* 14(7):4465–4474.
- 723 41. Stoiber M, Celniker S, Cherbas L, Brown B, Cherbas P (2016) Diverse Hormone Response  
724 Networks in 41 Independent *Drosophila* Cell Lines. *G3* 6(3):683–694.
- 725 42. Karim FD, Guild GM, Thummel CS (1993) The *Drosophila* Broad-Complex plays a key role in  
726 controlling ecdysone-regulated gene expression at the onset of metamorphosis. *Development*  
727 118(3):977–988.
- 728 43. Kiss I, Beaton AH, Tardiff J, Fristrom D, Fristrom JW (1988) Interactions and developmental  
729 effects of mutations in the Broad-Complex of *Drosophila melanogaster*. *Genetics* 118(2):247–259.
- 730 44. von Kalm L, Crossgrove K, Von Seggern D, Guild GM, Beckendorf SK (1994) The Broad-  
731 Complex directly controls a tissue-specific response to the steroid hormone ecdysone at the onset of  
732 *Drosophila* metamorphosis. *EMBO J* 13(15):3505–3516.
- 733 45. Chao AT, Guild GM (1986) Molecular analysis of the ecdysterone-inducible 2B5 “early” puff in  
734 *Drosophila melanogaster*.” *EMBO J* 5(1):143–150.
- 735 46. de Celis JF, Garcia-Bellido A, Bray SJ (1996) Activation and function of Notch at the dorsal-ventral  
736 boundary of the wing imaginal disc. *Development* 122(1):359–369.
- 737 47. Huppert SS, Jacobsen TL, Muskavitch MA (1997) Feedback regulation is central to Delta-Notch  
738 signalling required for *Drosophila* wing vein morphogenesis. *Development* 124(17):3283–3291.
- 739 48. Parks AL, Huppert SS, Muskavitch MA (1997) The dynamics of neurogenic signalling underlying  
740 bristle development in *Drosophila melanogaster*. *Mech Dev* 63(1):61–74.
- 741 49. Kooh PJ, Fehon RG, Muskavitch MA (1993) Implications of dynamic patterns of Delta and Notch  
742 expression for cellular interactions during *Drosophila* development. *Development* 117(2):493–507.
- 743 50. McKay DJ, Lieb JD (2013) A common set of DNA regulatory elements shapes *Drosophila*  
744 appendages. *Dev Cell* 27(3):306–318.

- 745 51. Huang F, Dambly-Chaudiere C, Ghysen A (1991) The emergence of sense organs in the wing disc  
746 of *Drosophila*. *Development* 111(4):1087–1095.
- 747 52. Ashburner M, Chihara C, Meltzer P, Richards G (1974) Temporal control of puffing activity in  
748 polytene chromosomes. *Cold Spring Harb Symp Quant Biol* 38:655–662.
- 749 53. Woodard CT, Baehrecke EH, Thummel CS (1994) A molecular mechanism for the stage specificity  
750 of the *Drosophila* prepupal genetic response to ecdysone. *Cell* 79(4):607–615.
- 751 54. Agawa Y, et al. (2007) *Drosophila* Blimp-1 is a transient transcriptional repressor that controls  
752 timing of the ecdysone-induced developmental pathway. *Mol Cell Biol* 27(24):8739–8747.
- 753 55. Mugat B, et al. (2000) Dynamic expression of broad-complex isoforms mediates temporal control of  
754 an ecdysteroid target gene at the onset of *Drosophila* metamorphosis. *Dev Biol* 227(1):104–117.
- 755 56. Johnston DM, et al. (2011) Ecdysone- and NO-Mediated Gene Regulation by Competing EcR/Usp  
756 and E75A Nuclear Receptors during *Drosophila* Development. *Molecular Cell* 44(1):51–61.
- 757 57. Wang S, Wang J, Sun Y, Song Q, Li S (2012) PKC-mediated USP phosphorylation at Ser35  
758 modulates 20-hydroxyecdysone signaling in *Drosophila*. *J Proteome Res* 11(12):6187–6196.
- 759 58. White KP, Hurban P, Watanabe T, Hogness DS (1997) Coordination of *Drosophila* metamorphosis  
760 by two ecdysone-induced nuclear receptors. *Science* 276(5309):114–117.
- 761 59. Chan SKK, et al. (2017) Role of co-repressor genomic landscapes in shaping the Notch response.  
762 *PLoS Genet* 13(11):e1007096.
- 763 60. Wen L, Shi Y-B (2016) Regulation of growth rate and developmental timing by *Xenopus* thyroid  
764 hormone receptor alpha. *Dev Growth Differ* 58(1):106–115.
- 765 61. Jiang L, Pearson JC, Crews ST (2010) Diverse modes of *Drosophila* tracheal fusion cell  
766 transcriptional regulation. *Mech Dev* 127(5–6):265–280.
- 767 62. Dobin A, et al. (2013) STAR: ultrafast universal RNA-seq aligner. *Bioinformatics* 29(1):15–21.
- 768 63. Liao Y, Smyth GK, Shi W (2013) The Subread aligner: fast, accurate and scalable read mapping by  
769 seed-and-vote. *Nucleic Acids Res* 41(10):e108.
- 770 64. Love MI, Huber W, Anders S (2014) Moderated estimation of fold change and dispersion for RNA-  
771 seq data with DESeq2. *Genome Biology* 15:550.
- 772 65. Rahnenführer AAJ (2018) topGO. *topGO: Enrichment Analysis for Gene Ontology*. Available at:  
773 <http://bioconductor.org/packages/topGO/> [Accessed November 26, 2018].
- 774 66. Lawrence M, et al. (2013) Software for computing and annotating genomic ranges. *PLoS Comput*  
775 *Biol* 9(8):e1003118.
- 776 67. Langmead B, Salzberg SL (2012) Fast gapped-read alignment with Bowtie 2. *Nat Methods*  
777 9(4):357–359.
- 778 68. Li H, et al. (2009) The Sequence Alignment/Map format and SAMtools. *Bioinformatics*  
779 25(16):2078–2079.

- 780 69. Quinlan AR, Hall IM (2010) BEDTools: a flexible suite of utilities for comparing genomic features.  
781 *Bioinformatics* 26(6):841–842.
- 782 70. Kent WJ, Zweig AS, Barber G, Hinrichs AS, Karolchik D (2010) BigWig and BigBed: enabling  
783 browsing of large distributed datasets. *Bioinformatics* 26(17):2204–2207.
- 784 71. Zhang Y, et al. (2008) Model-based Analysis of ChIP-Seq (MACS). *Genome Biology* 9:R137.
- 785 72. Stempor P, Ahringer J (2016) SeqPlots - Interactive software for exploratory data analyses, pattern  
786 discovery and visualization in genomics. *Wellcome Open Res* 1:14.
- 787 73. Zhu LJ, et al. (2010) ChIPpeakAnno: a Bioconductor package to annotate ChIP-seq and ChIP-chip  
788 data. *BMC Bioinformatics* 11:237.
- 789 74. Bailey TL (2011) DREME: motif discovery in transcription factor ChIP-seq data. *Bioinformatics*  
790 27(12):1653–1659.
- 791 75. Grant CE, Bailey TL, Noble WS (2011) FIMO: scanning for occurrences of a given motif.  
792 *Bioinformatics* 27(7):1017–1018.
- 793 76. Crickmore MA, Mann RS (2006) Hox control of organ size by regulation of morphogen production  
794 and mobility. *Science* 313(5783):63–68.

795

796

797 **FIGURE LEGENDS:**

798 **Figure 1: EcR is required to promote global changes in gene expression in wings between -**  
799 **6hAPF and +6hAPF**

800 (A) Cartoon diagram of wildtype (WT) wing eversion between -6hAPF and +6hAPF. (B)  
801 Confocal images of *WT* wings and wings expressing *UAS-EcR RNAi* from *vg-tubGAL4* (hereafter  
802 EcR-RNAi) at -6hAPF and +6hAPF. The dorsal-ventral (DV) boundary is marked by an orange  
803 dotted line. The edge of the pouch is indicated by a blue dotted line. (B) MA plots (top) and gene  
804 ontology terms (bottom) of RNAseq comparing gene *WT* wings at -6hAPF and +6hAPF. (C-D)  
805 MA Plots and clustered heatmaps of RNAseq comparing EcR-RNAi wings and *WT* wings at -  
806 6hAPF. (E-F) MA plots and heatmaps of RNAseq comparing EcR-RNAi wings at *WT* wings at  
807 +6hAPF. Scale bars for immunostaining are 100 $\mu$ m. For MA plots, differentially expressed genes  
808 ( $p_{adj} < 0.05$ , absolute  $\log_2$  fold change  $> 1$ ) are colored red and blue. Heatmaps are represented as  
809 the fraction of max *WT* counts. Colored bars to the right denote start and end of each cluster. Line  
810 plots are the mean signal for each cluster.

811 **Figure 2: EcR binds extensively throughout the genome**

812 Browser shots of EcR CUT&RUN signal (z-score) at -6hAPF and +6hAPF at (A) canonical and  
813 (B) non-canonical ecdysone response genes. Signal range is indicated in top-left corner.

814 **Figure 3: EcR binding is temporally dynamic**

815 (A) Browser shots of EcR CUT&RUN data from -6hAPF and +6hAPF wings, with examples of  
816 -6hAPF unique, +6hAPF unique and -6h/+6h stable peaks highlighted by grey boxes. (B) Venn  
817 diagrams showing the number of peaks in each category. (D) Sequence logos comparing the  
818 canonical EcR/USP binding motif (top) to motifs identified through *de novo* motif analysis. (C)

819 Heatmaps and average signal plots of EcR C&R signal (z-score). (E) Motif density plots of the  
820 number of EcR motifs around the peak summit. For  $-6h/+6h$  stable peaks, the motif summit for  
821  $+6h$  was used. (F) Violin plots showing the average motif strength ( $-\log_{10}$  p-value) of motifs  
822 within EcR peaks (\* p-value < 0.05; \*\*\* p-value < 0.001, students t-test).

#### 823 **Figure 4: EcR binding is tissue-specific**

824 (A) Browser shots comparing EcR CUT&RUN to EcR ChIPseq in S2 cells (25). Grey boxes  
825 highlight examples of shared (left), S2-specific (middle) and wing-specific peaks. (B) Bar plots  
826 showing the proportion of EcR C&R peaks that overlap an S2 ChIP peak in each category. (C) A  
827 comparison of the average signal within EcR C&R peaks colored by how they behave temporally  
828 (left) and whether they overlap an S2 ChIP peak (right). (D) GO terms of the closest gene to a  
829 wing EcR peak stratified by whether they overlap an S2 ChIP peak.

#### 830 **Figure 5: EcR regulates the temporal activity of an enhancer for the gene *broad***

831 (A) Browser shots of the *br* locus, with the location of the *br<sup>disc</sup>* highlighted by a shaded gray  
832 region. (B) *br<sup>disc</sup>* activity in WT wings (red) at 96hrs after egg laying (96AEL) and 120AEL ( $-$   
833 6hAPF). (C) The effect expressing EcR dominant negative (EcR<sup>DN</sup>) in the anterior compartment  
834 of the wing marked by GFP (green) on *br<sup>disc</sup>* activity. (D) Comparison of *br<sup>disc</sup>* activity between  
835 the anterior (Ant) and posterior (Pos) compartments of the wing in WT and EcR-RNAi wings (\*  
836  $p < 0.05$ ; \*\*\*  $p < 0.005$ , paired student's t-test). Dotted yellow boxes indicate the location of insets.  
837 Scale bars are 100uM.

#### 838 **Figure 6: EcR regulates the spatial activity of enhancers for the gene *Dl***

839 (A) Browser shots of the *Dl* locus, with the location of the *Delta<sup>SOP</sup>* and *Delta<sup>F</sup>* highlighted by a  
840 gray box. (B-C) Enhancer activity of *Dl<sup>SOP</sup>* (green) showing overlap with Ac and Dl. (D-E)

841 Enhancer activity of  $Dl^{leg}$  showing overlap with D1 and Ac. (F-G) Enhancer activity of  $Dl^{SOP}$  and  
842  $Dl^{leg}$  in  $usp^3$  mitotic clones which are marked by the absence of RFP. Dotted yellow boxes indicate  
843 the location of insets. Scale bars are 100 $\mu$ m.



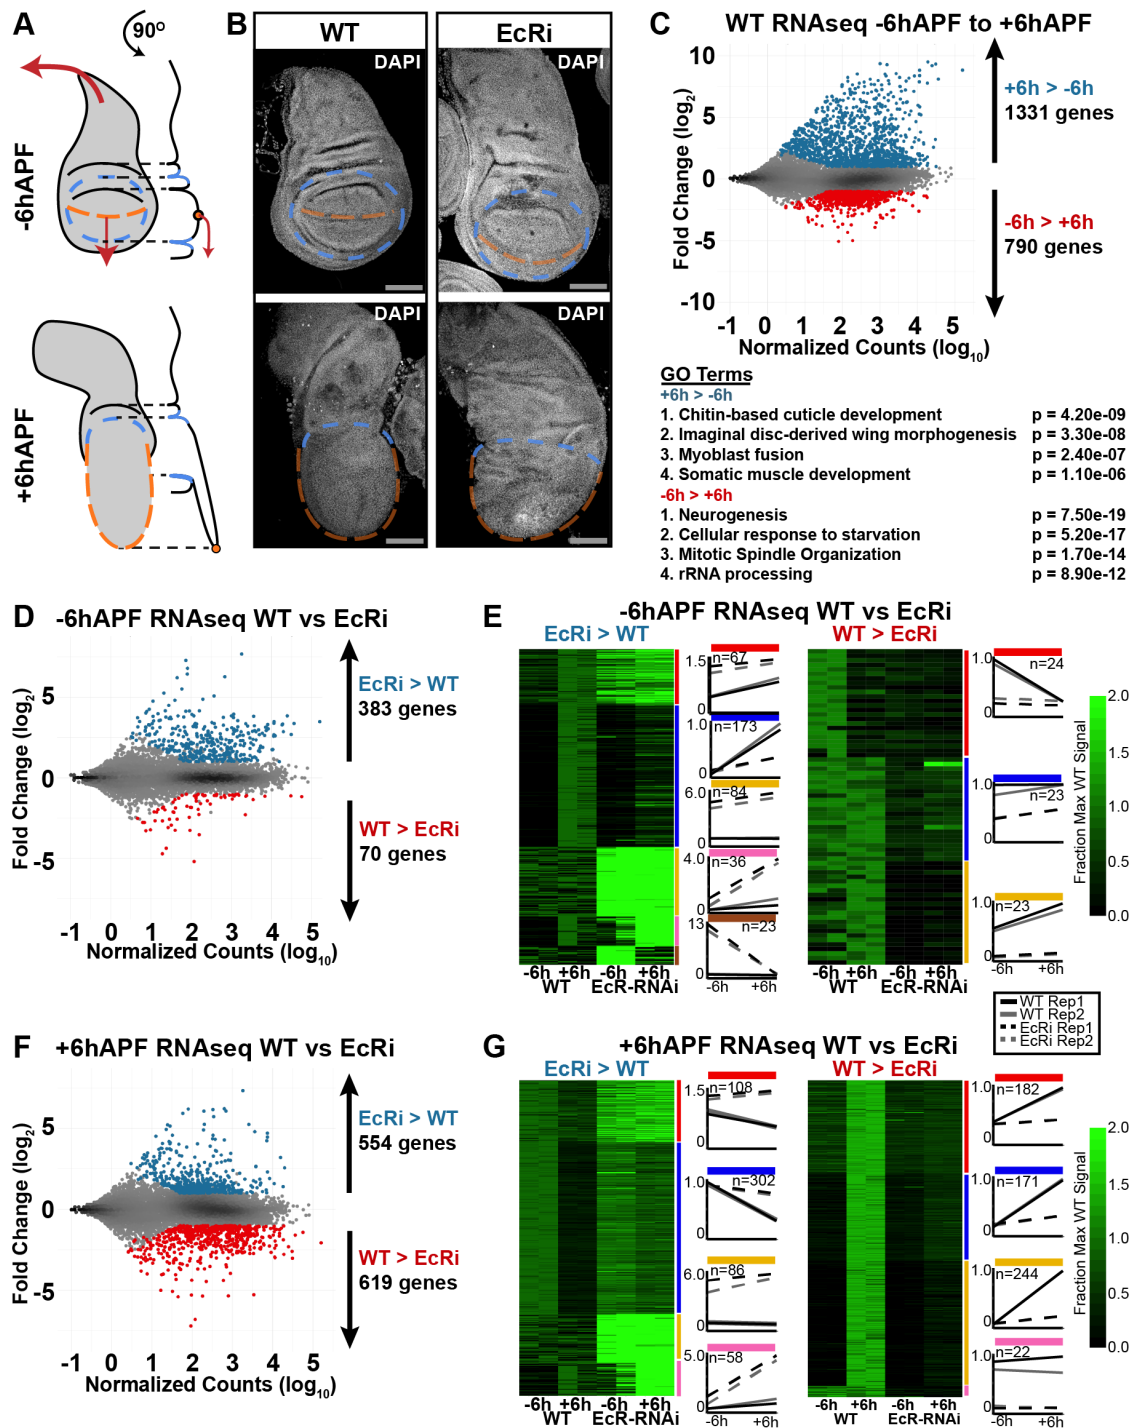

**Figure 1: EcR is required to promote global changes in gene expression in wings between -6hAPF and +6hAPF**



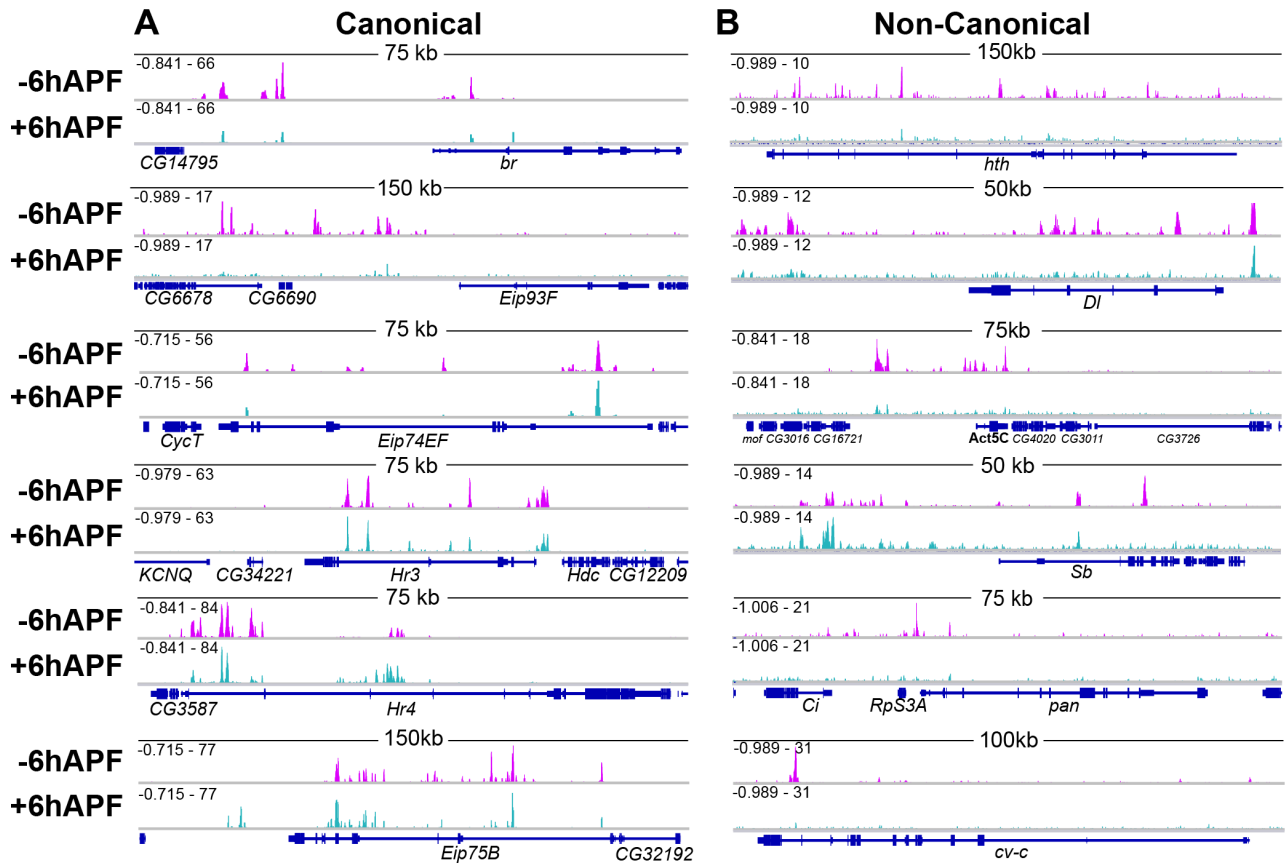

Figure 2: EcR binds extensively throughout the genome

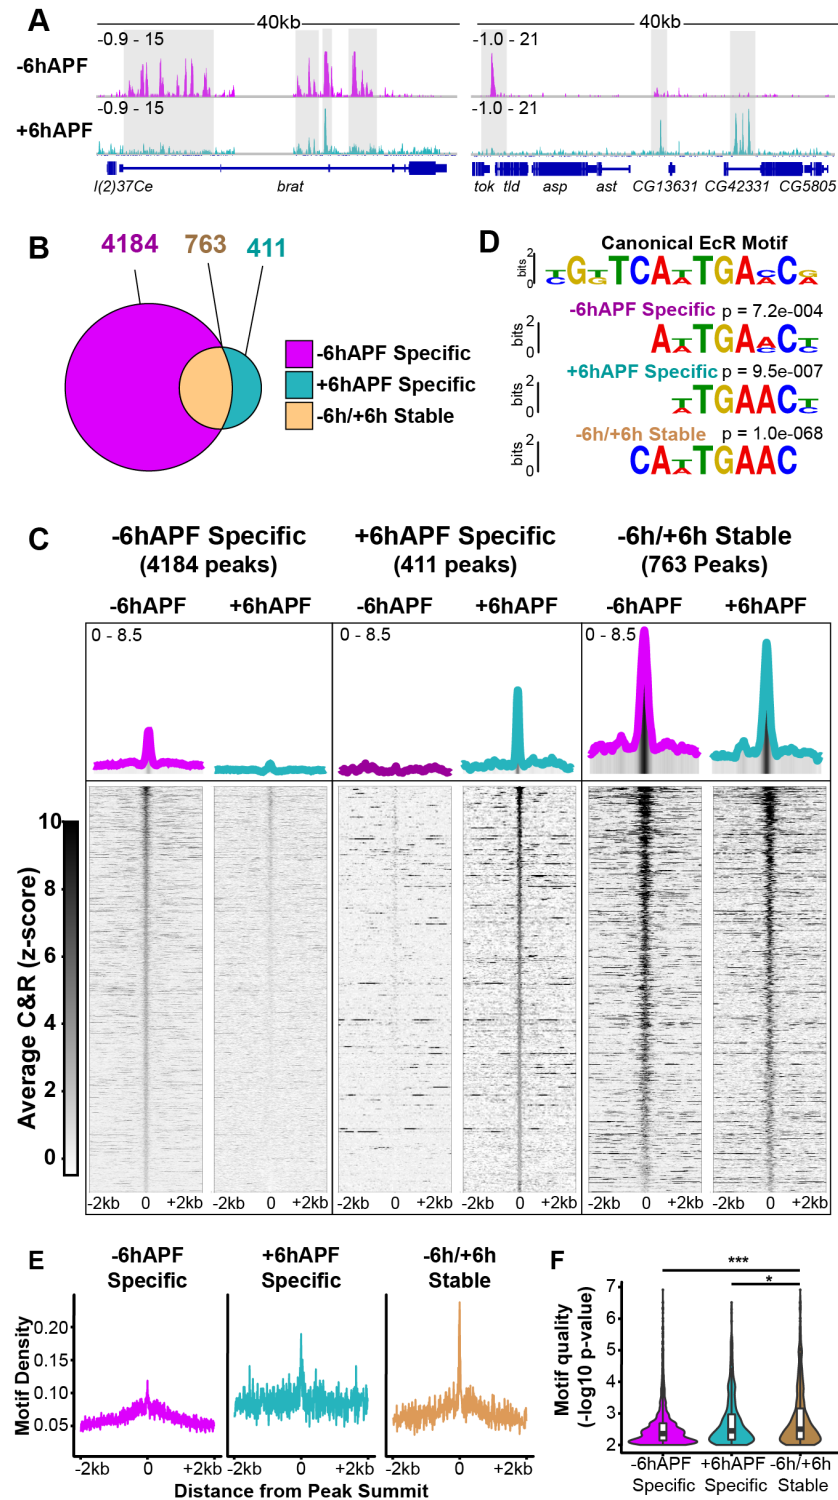

**Figure 3: EcR binding is temporally dynamic**

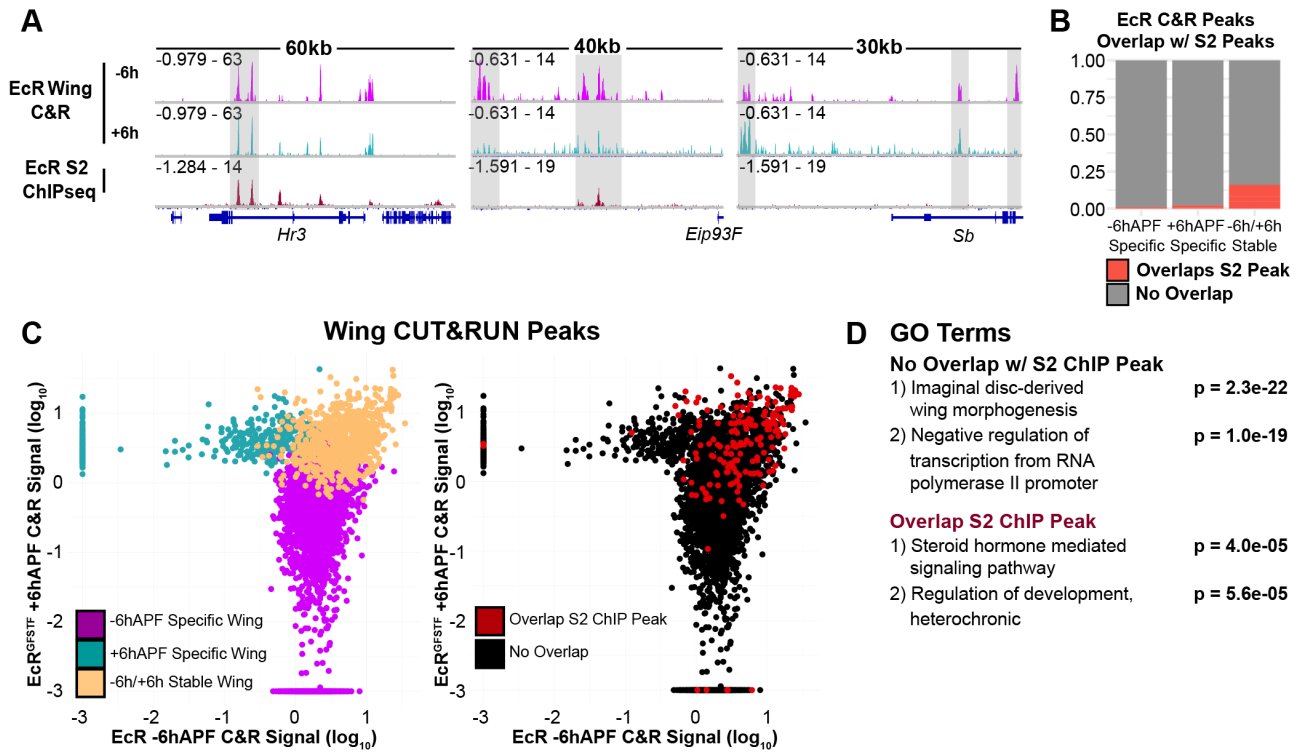

Figure 4: EcR binding is tissue-specific

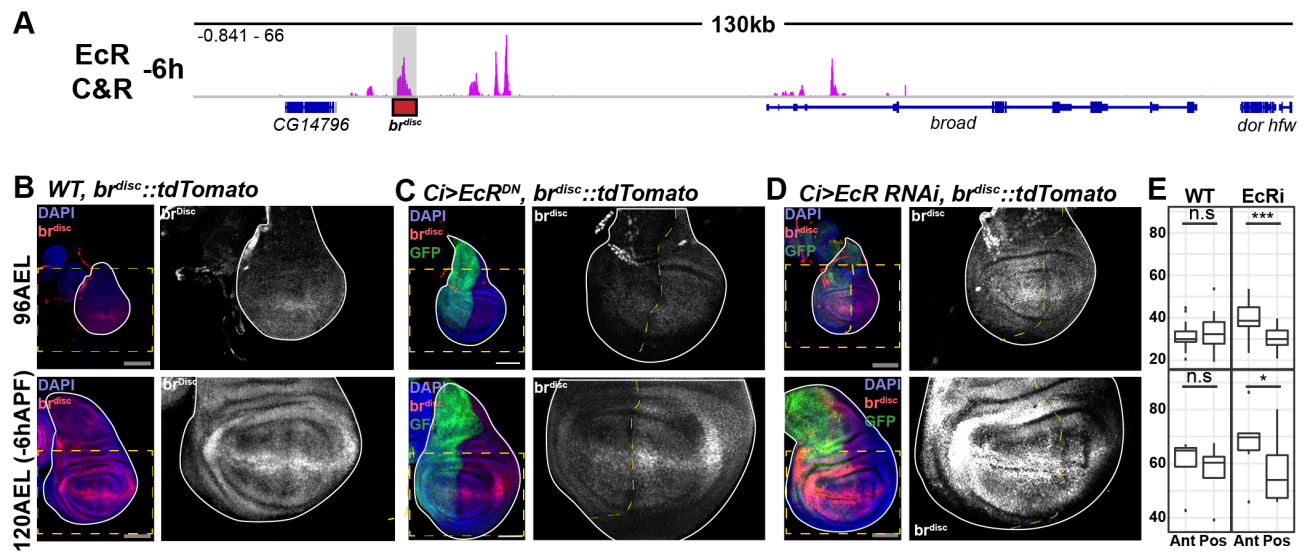

Figure 5: EcR regulates the temporal activity of an enhancer for the gene *broad*

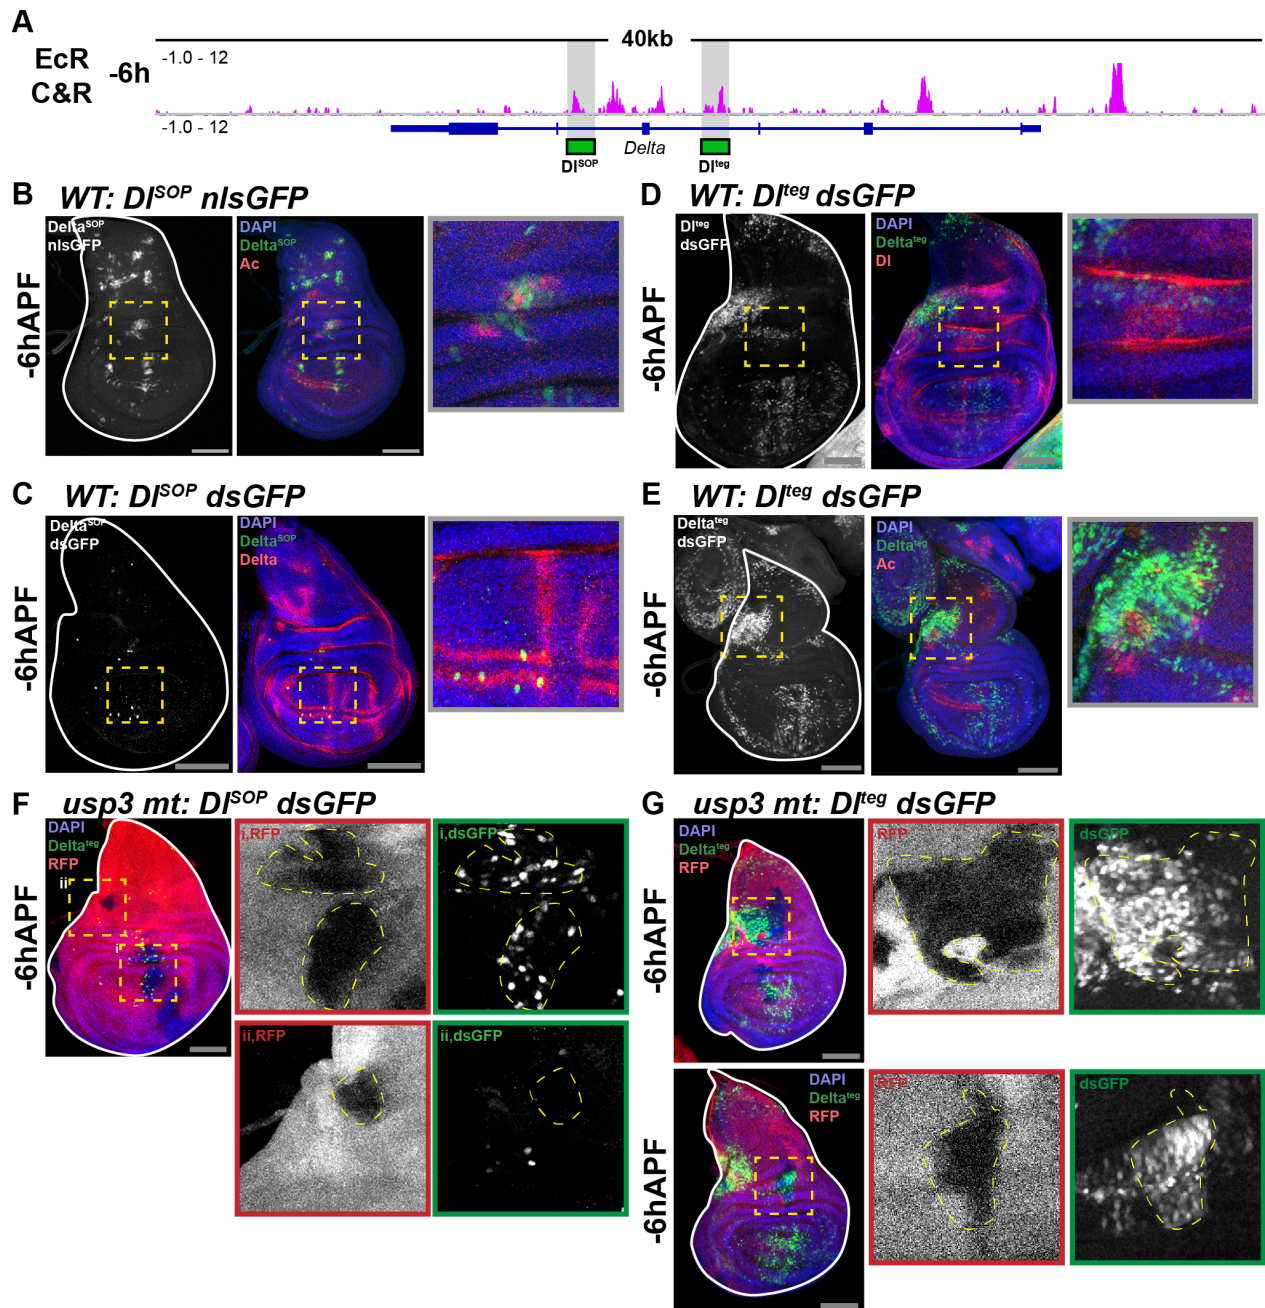

**Figure 6: EcR regulates the spatial activity of enhancers for the gene *Delta***

# Supplemental Information

A direct and widespread role for the nuclear receptor EcR  
in mediating the response to ecdysone in *Drosophila*

Christopher M. Uyehara<sup>1-4</sup> and Daniel J. McKay<sup>1,2,4\*</sup>

<sup>1</sup>Department of Biology, <sup>2</sup>Department of Genetics, <sup>3</sup>Curriculum in Genetics and Molecular Biology, <sup>4</sup>Integrative Program for Biological and Genome Sciences, The University of North Carolina at Chapel Hill, Chapel Hill, NC, 27599

\*Corresponding author:

Daniel J. McKay

Assistant Professor

Department of Biology, Department of Genetics, Integrative Program for Biological and Genome Sciences

The University of North Carolina at Chapel Hill

Chapel Hill, NC 27599, USA

Phone: (919) 843-2064

Email: [dmckay1@email.unc.edu](mailto:dmckay1@email.unc.edu)



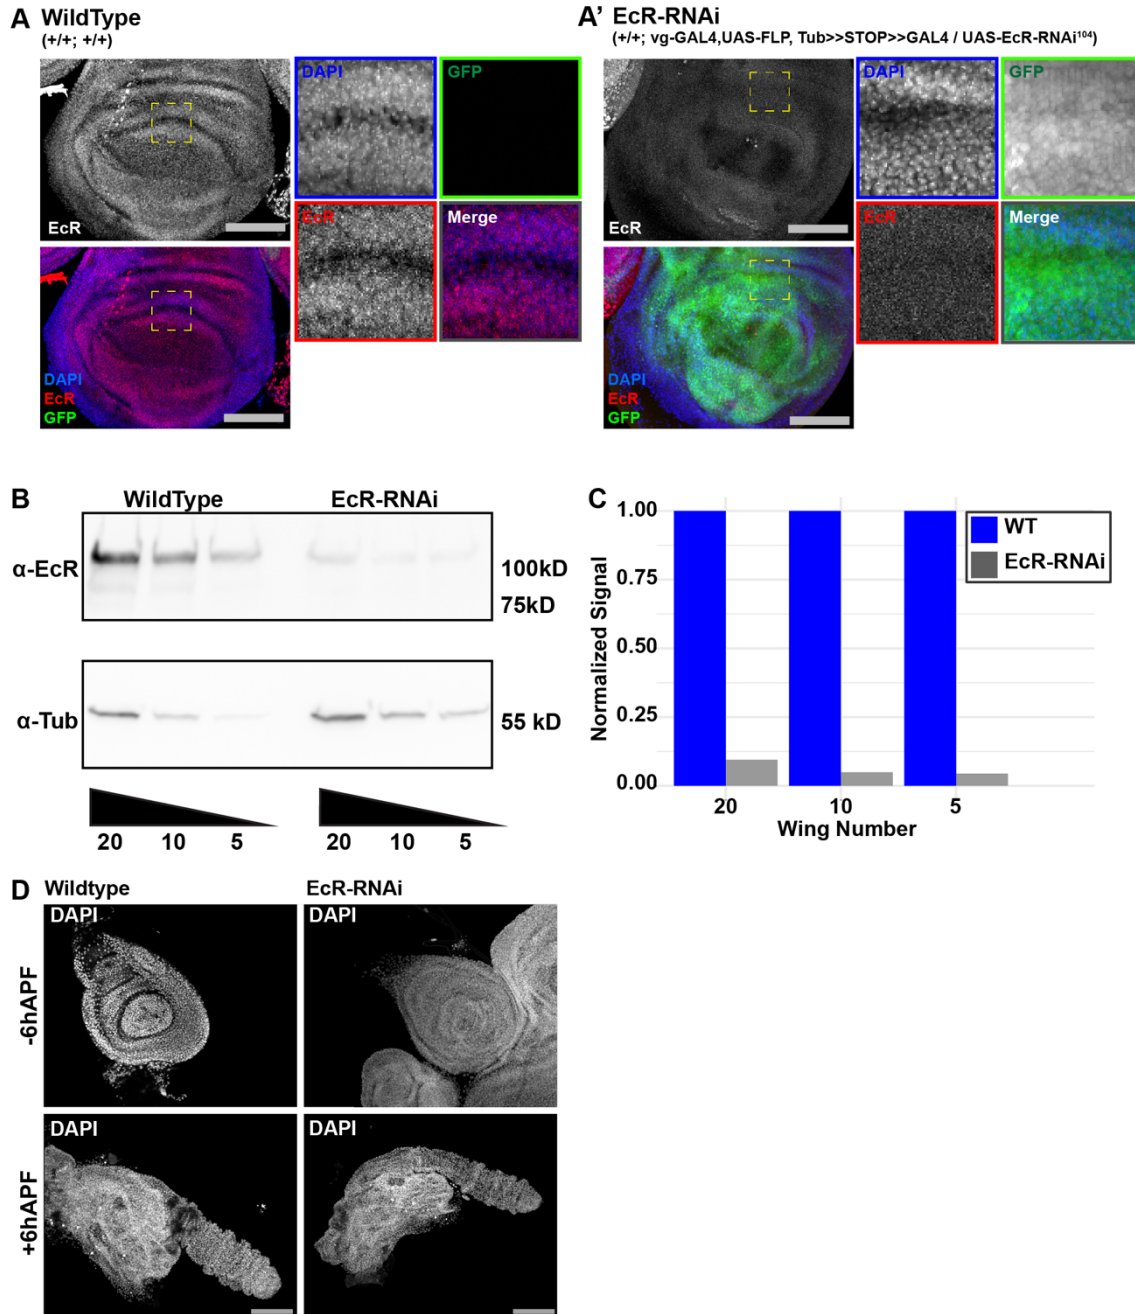

**Fig. S1. EcR-RNAi knock down is effective and does not result in systemic developmental arrest**

(A) WT and *vg, tub-GAL4, UAS-EcR-RNAi* (hereafter EcR-RNAi) wings at -6hAPF. Location of insets is indicated by dashed boxes. (B) Western blots of EcR and alpha-tubulin levels in WT and EcR-RNAi wings from a serial dilution of wing tissue. (C) Quantification of western blots normalized to alpha-tubulin expressed as the fraction of WT signal. (D) Legs from WT and EcR-RNAi legs at -6hAPF and +6hAPF. Scale bars are 100 $\mu$ m.

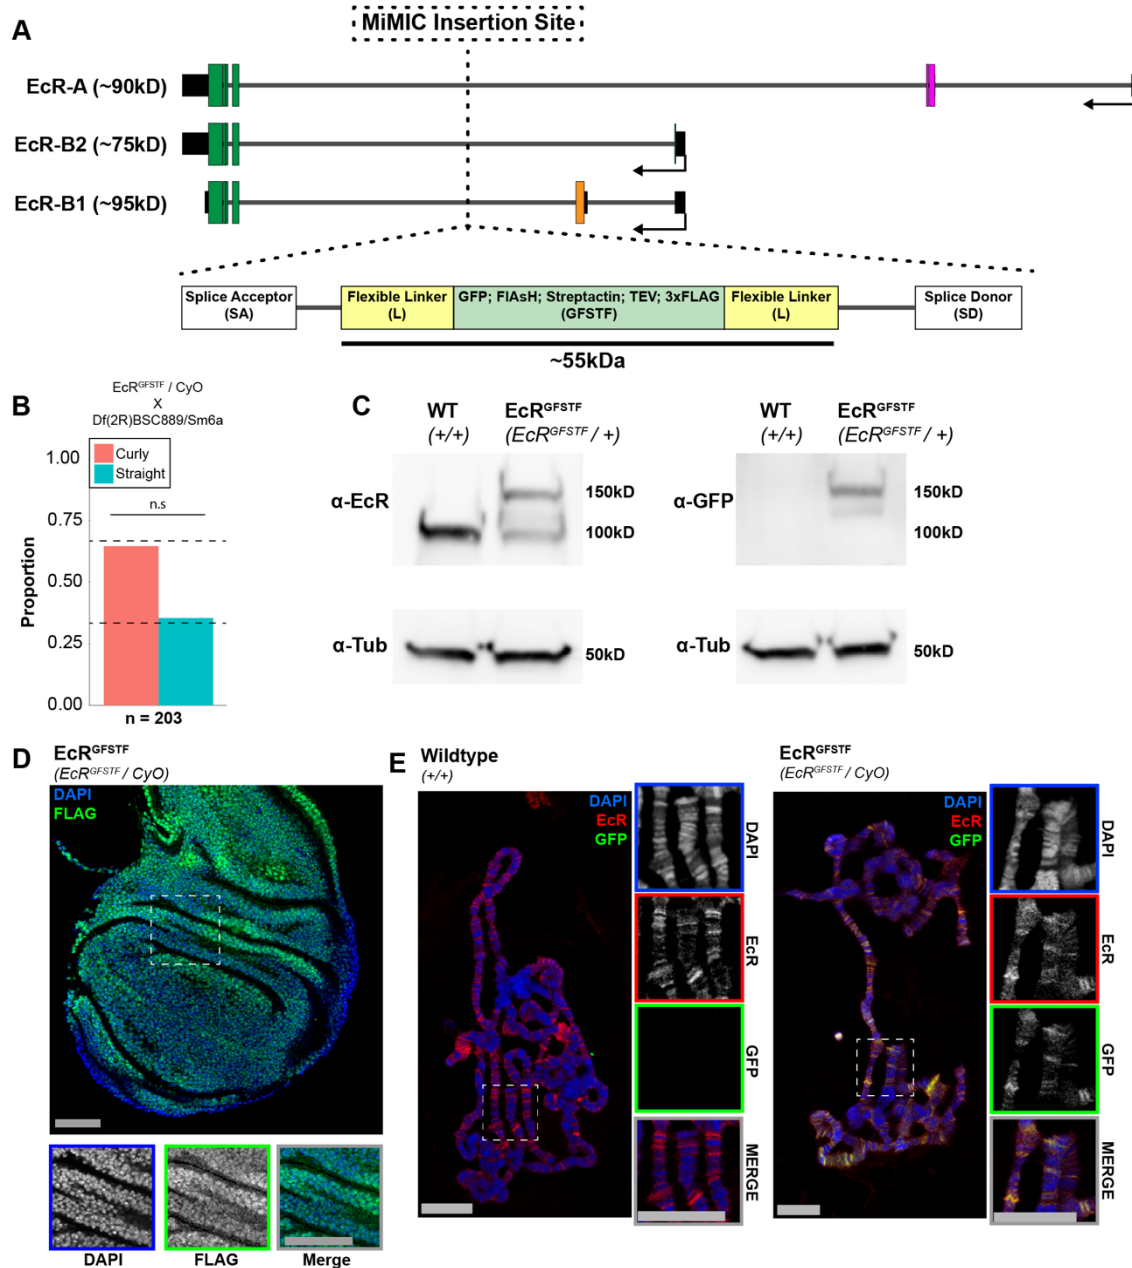

**Fig. S2. The EcR<sup>GFSTF</sup> tag does not impair EcR function**

(A) Location of the MiMIC insertion point in the EcR locus. The structure and size of the tag is indicated below. The insertion point is upstream of all exons shared between EcR isoforms and downstream of all isoform-specific exons. (B) Viability assay of *EcR<sup>GFSTF</sup>* animals crossed to a deficiency spanning the EcR locus. Statistical significance was determined using a chi-squared test with an expected ratio of 1:2 homozygous to heterozygous animals. (C) Western blots of wings from *EcR<sup>GFSTF</sup>* or WT animals stained for EcR or EcR<sup>GFSTF</sup> (anti-GFP). (D) Immunostaining for EcR<sup>GFSTF</sup> (anti-FLAG) shows nuclear localization in wings. Scale bars are 50 $\mu$ m (E) Polytene squashes from WT or *EcR<sup>GFSTF</sup>*. Scale bars are 25 $\mu$ m. Dashed boxes indicate the location of insets.



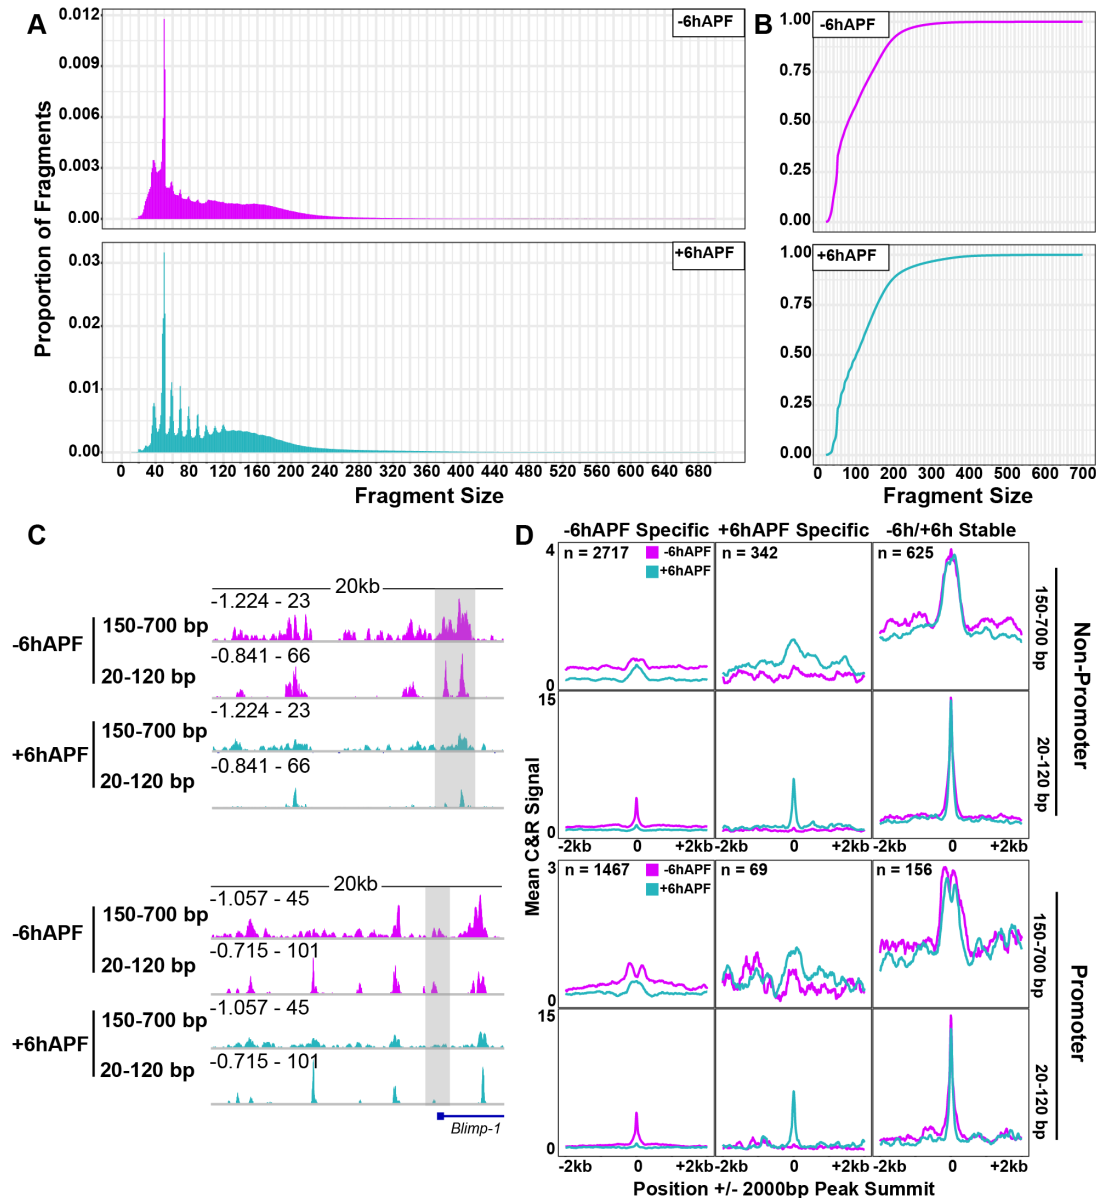

**Fig. S3. EcR CUT&RUN exhibits similar properties to those that have been previously reported**

(A) Histograms of fragment sizes from EcR CUT&RUN. (B) Cumulative distribution plot of fragment sizes. (C) Representative browser shots comparing EcR C&R signal from 20-120 bp fragments and 150-700 bp. (D) Average signal plots of EcR C&R signal split by overlap with annotated promoters and fragment size.

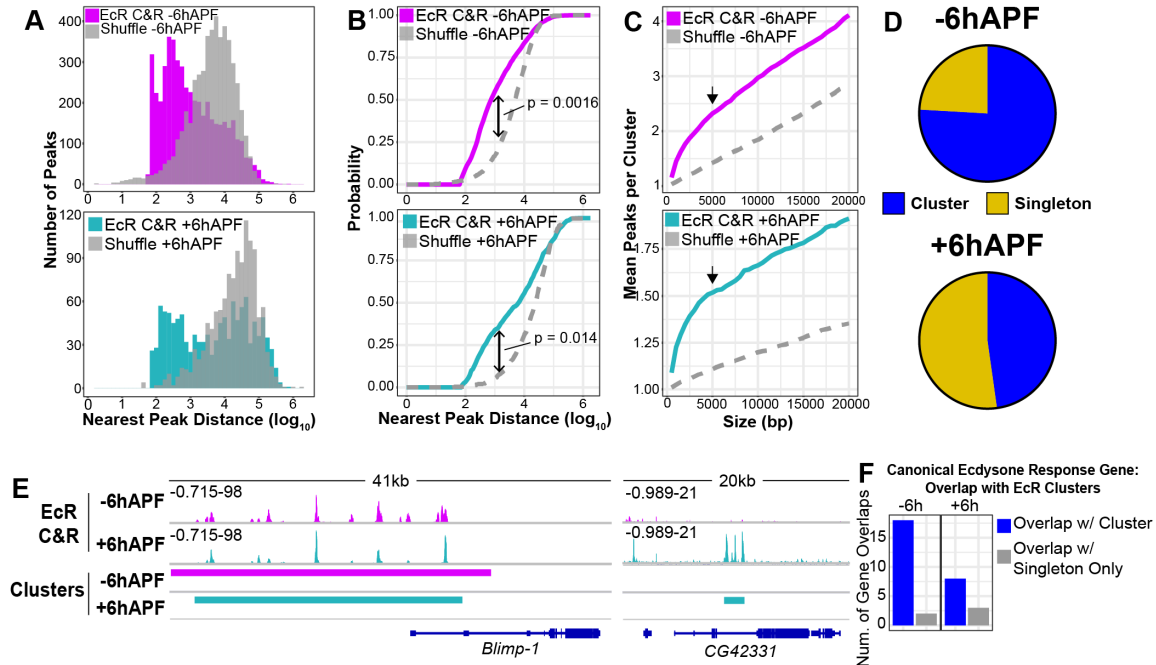

**Fig. S4. EcR peaks are clustered genome-wide**

(A) Histograms of distance of each EcR peak to its nearest neighbor compared to a peak set shuffled over FAIRE peaks. (B) Cumulative distribution plots of the distance of each EcR peak to its nearest neighbor compared to shuffled peaks. Distributions were compared with a KS-test. (C) The mean number of peaks that overlap at least one other peak using different sizes of EcR peak. 5000bp (arrow) was used to define clusters in subsequent analyses. (D) Numbers of EcR peaks that fall into a cluster at -6hAPF and +6hAPF. (E) Examples of EcR clusters. (F) Numbers of canonical ecdysone-response genes that overlap an EcR cluster compared to those that only overlap an EcR singleton (ie. non-clustered peak). Canonical ecdysone response genes were defined as the union set of genes (42 total) in gene ontology terms: Cellular response to ecdysone (GO:0071390); Steroid hormone mediated signaling pathway (GO:0043401).

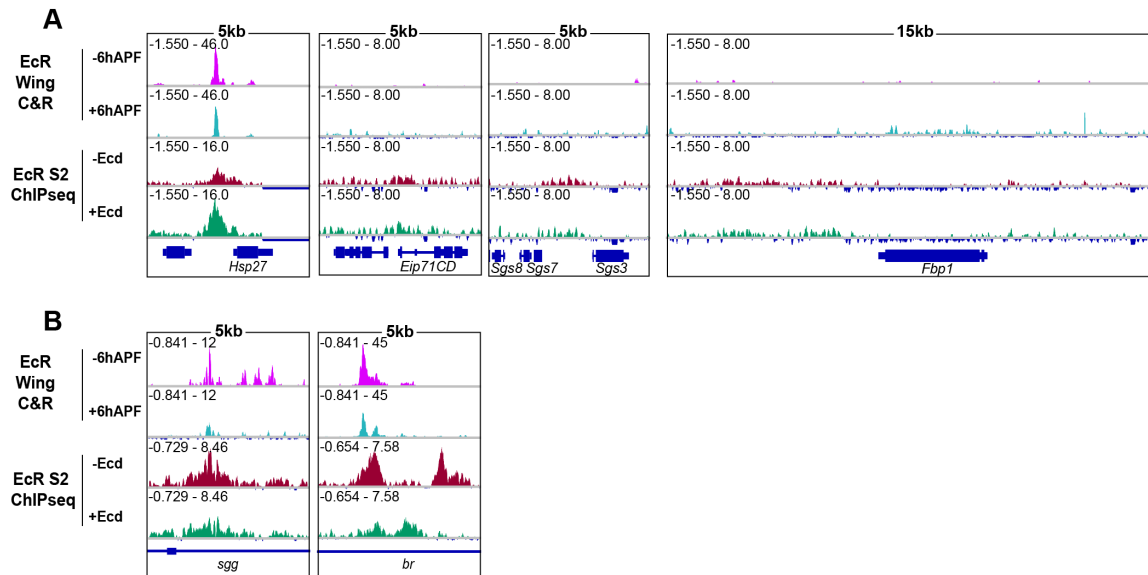

**Fig. S5. EcR binding is absent in wings and S2 cells from many sites previously identified as functional EcR binding sites in other tissues**

(A) Browser shots showing EcR C&R signal and S2 ChIPseq (1) at previously identified EcR binding sites. (B) Browser shots comparing precision of EcR binding between EcR and S2 cells.

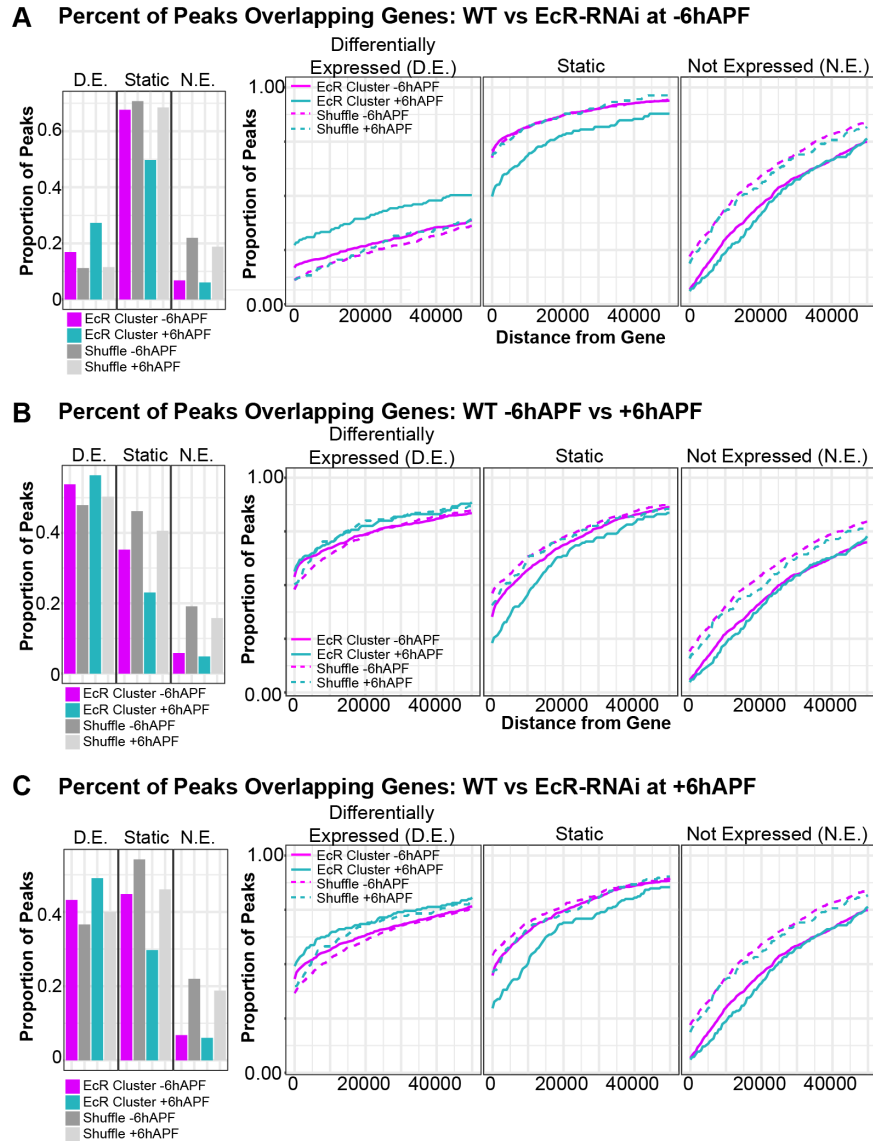

**Fig. S6. EcR binding is enriched at genes that are affected by EcR knockdown**

Percentage of EcR clusters that overlap (left), or fall within some distance of (right), a differentially expressed (D.E.), static, or not-expressed (N.E.) gene in RNaseq comparing (A) WT to EcR-RNAi wings at -6hAPF, (B) WT -6hAPF to +6hAPF, (C) WT to EcR-RNAi at +6hAPF. EcR peaks were compared to peaks randomly shuffled over FAIRE peaks. Differentially expressed genes were defined as genes with an adjusted p-value < 0.05. Not expressed genes were defined as genes that were filtered out by DESeq2 (padj = NA).

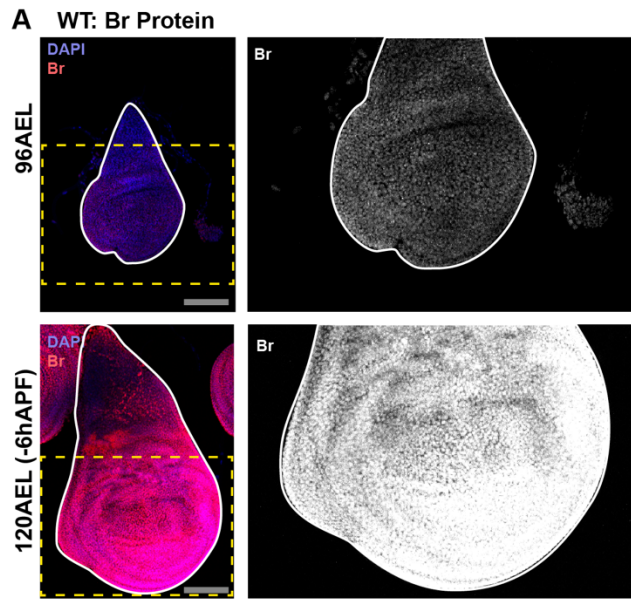

**Fig. S7. Broad protein levels increase with time.**

(A) Changes in Br protein (red) levels over time in WT wings between 96hrs after egg laying (96AEL) and 120AEL (-6hAPF). Scale bars are 100um. DAPI was used to stain nuclei.

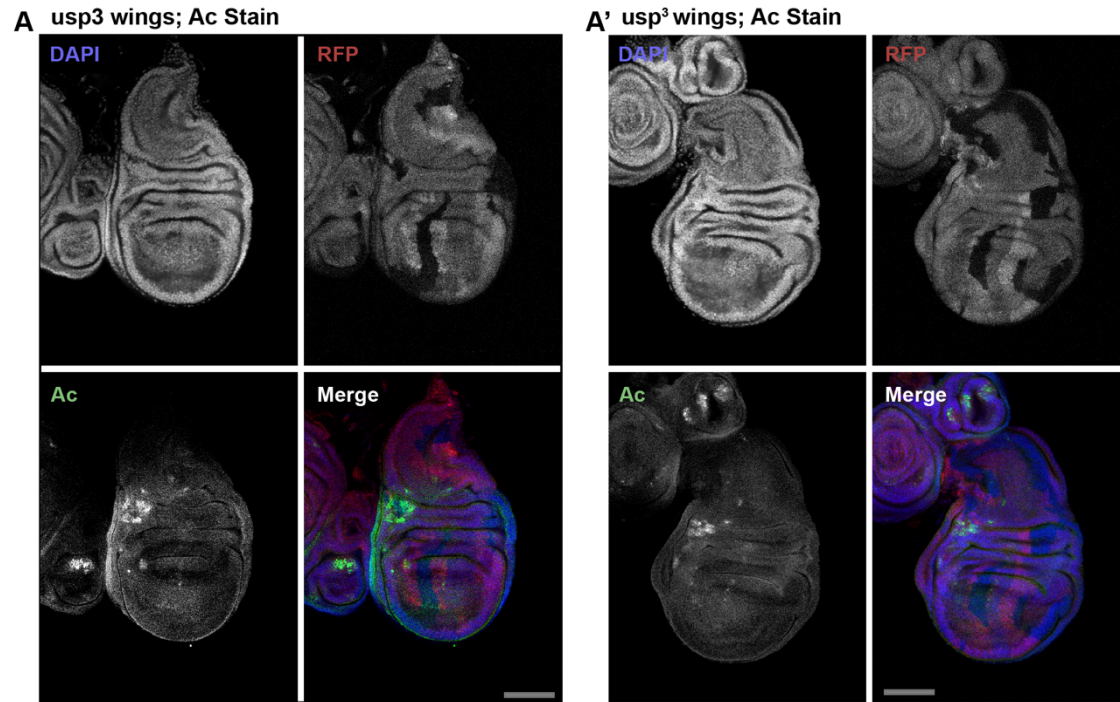

**Fig. S8: *usp3* clones do not result in cell fate changes**

(A) -6hAPF wings showing *usp3* mitotic clones stained for Ac. Clones are marked by the absence of RFP. Scale bars are 100 $\mu$ m. DAPI was used to stain nuclei.

**Table S1: Gene Ontology Terms for EcR Clusters at -6hAPF (top five)**

| Behavior        | Cluster | GO.ID      | Term                                                                                                        | p-value<br>(-log10) |
|-----------------|---------|------------|-------------------------------------------------------------------------------------------------------------|---------------------|
| ECRi3LW > WT3LW | 1       | GO:0015833 | peptide transport                                                                                           | 2.508638306         |
| ECRi3LW > WT3LW | 1       | GO:0035848 | oviduct morphogenesis                                                                                       | 2.356547324         |
| ECRi3LW > WT3LW | 1       | GO:0010898 | positive regulation of triglyceride catabolic process                                                       | 2.356547324         |
| ECRi3LW > WT3LW | 1       | GO:0010716 | negative regulation of extracellular matrix disassembly                                                     | 2.356547324         |
| ECRi3LW > WT3LW | 1       | GO:0048621 | post-embryonic digestive tract morphogenesis                                                                | 2.356547324         |
| ECRi3LW > WT3LW | 2       | GO:0008063 | Toll signaling pathway                                                                                      | 4.886056648         |
| ECRi3LW > WT3LW | 2       | GO:0040003 | chitin-based cuticle development                                                                            | 3.744727495         |
| ECRi3LW > WT3LW | 2       | GO:0035074 | pupation                                                                                                    | 3.148741651         |
| ECRi3LW > WT3LW | 2       | GO:0006965 | positive regulation of biosynthetic process of antibacterial peptides active against Gram-positive bacteria | 2.928117993         |
| ECRi3LW > WT3LW | 2       | GO:0016045 | detection of bacterium                                                                                      | 2.928117993         |
| ECRi3LW > WT3LW | 3       | GO:0002028 | regulation of sodium ion transport                                                                          | 3.443697499         |
| ECRi3LW > WT3LW | 3       | GO:0045479 | vesicle targeting to fusome                                                                                 | 2.301899454         |
| ECRi3LW > WT3LW | 3       | GO:0042554 | superoxide anion generation                                                                                 | 2.301899454         |
| ECRi3LW > WT3LW | 3       | GO:0070731 | cGMP transport                                                                                              | 2.301899454         |
| ECRi3LW > WT3LW | 3       | GO:0051597 | response to methylmercury                                                                                   | 2.301899454         |
| ECRi3LW > WT3LW | 4       | GO:0040003 | chitin-based cuticle development                                                                            | 18.95860731         |
| ECRi3LW > WT3LW | 4       | GO:0003383 | apical constriction                                                                                         | 1.455931956         |
| ECRi3LW > WT3LW | 4       | GO:0008362 | chitin-based embryonic cuticle biosynthetic process                                                         | 1.387216143         |
| ECRi3LW > WT3LW | 4       | GO:0070252 | actin-mediated cell contraction                                                                             | 1.387216143         |
| ECRi3LW > WT3LW | 4       | GO:0042335 | cuticle development                                                                                         | 1.356547324         |
| ECRi3LW > WT3LW | 5       | GO:0031427 | response to methotrexate                                                                                    | 3.958607315         |
| ECRi3LW > WT3LW | 5       | GO:0007218 | neuropeptide signaling pathway                                                                              | 3.244125144         |
| ECRi3LW > WT3LW | 5       | GO:0006094 | gluconeogenesis                                                                                             | 2.36552273          |
| ECRi3LW > WT3LW | 5       | GO:0009408 | response to heat                                                                                            | 2.191789027         |
| ECRi3LW > WT3LW | 5       | GO:0035079 | polytene chromosome puffing                                                                                 | 1.998699067         |
| WT3LW > ECRi3LW | 1       | GO:0071390 | cellular response to ecdysone                                                                               | 3.602059991         |
| WT3LW > ECRi3LW | 1       | GO:0009597 | detection of virus                                                                                          | 2.872895202         |
| WT3LW > ECRi3LW | 1       | GO:0006833 | water transport                                                                                             | 2.571865206         |
| WT3LW > ECRi3LW | 1       | GO:0071329 | cellular response to sucrose stimulus                                                                       | 2.395773947         |
| WT3LW > ECRi3LW | 1       | GO:0007610 | behavior                                                                                                    | 2.381951903         |
| WT3LW > ECRi3LW | 2       | GO:0043401 | steroid hormone mediated signaling pathway                                                                  | 3.214670165         |
| WT3LW > ECRi3LW | 2       | GO:0045200 | establishment of neuroblast polarity                                                                        | 2.302770657         |
| WT3LW > ECRi3LW | 2       | GO:0090163 | establishment of epithelial cell planar polarity                                                            | 2.302770657         |
| WT3LW > ECRi3LW | 2       | GO:0072697 | protein localization to cell cortex                                                                         | 2.302770657         |
| WT3LW > ECRi3LW | 2       | GO:0016336 | establishment or maintenance of polarity of larval imaginal disc epithelium                                 | 2.206209615         |
| WT3LW > ECRi3LW | 3       | GO:0035320 | imaginal disc-derived wing hair site selection                                                              | 2.187086643         |

|                 |   |            |                                         |             |
|-----------------|---|------------|-----------------------------------------|-------------|
| WT3LW > ECRi3LW | 3 | GO:0071632 | optomotor response                      | 2.187086643 |
| WT3LW > ECRi3LW | 3 | GO:0019752 | carboxylic acid metabolic process       | 2.173925197 |
| WT3LW > ECRi3LW | 3 | GO:0009408 | response to heat                        | 2.086186148 |
| WT3LW > ECRi3LW | 3 | GO:0001676 | long-chain fatty acid metabolic process | 1.943095149 |



**Table S2: Gene Ontology Terms for EcR Clusters at +6hAPF (top five)**

| Behavior            | Cluster | GO.ID      | Term                                                                                            | p-value<br>(-log10) |
|---------------------|---------|------------|-------------------------------------------------------------------------------------------------|---------------------|
| ECRi6hAPF > WT6hAPF | 1       | GO:0090100 | positive regulation of transmembrane receptor protein serine/threonine kinase signaling pathway | 2.468521083         |
| ECRi6hAPF > WT6hAPF | 1       | GO:0006784 | heme a biosynthetic process                                                                     | 2.200659451         |
| ECRi6hAPF > WT6hAPF | 1       | GO:0001837 | epithelial to mesenchymal transition                                                            | 2.200659451         |
| ECRi6hAPF > WT6hAPF | 1       | GO:1902037 | negative regulation of hematopoietic stem cell differentiation                                  | 2.200659451         |
| ECRi6hAPF > WT6hAPF | 1       | GO:0016267 | O-glycan processing, core 1                                                                     | 2.200659451         |
| ECRi6hAPF > WT6hAPF | 2       | GO:0009267 | cellular response to starvation                                                                 | 14.26760624         |
| ECRi6hAPF > WT6hAPF | 2       | GO:0022008 | neurogenesis                                                                                    | 13.63827216         |
| ECRi6hAPF > WT6hAPF | 2       | GO:0007052 | mitotic spindle organization                                                                    | 12.60205999         |
| ECRi6hAPF > WT6hAPF | 2       | GO:0006364 | rRNA processing                                                                                 | 10.7212464          |
| ECRi6hAPF > WT6hAPF | 2       | GO:0007088 | regulation of mitotic nuclear division                                                          | 7.420216403         |
| ECRi6hAPF > WT6hAPF | 3       | GO:0002028 | regulation of sodium ion transport                                                              | 3.420216403         |
| ECRi6hAPF > WT6hAPF | 3       | GO:0055072 | iron ion homeostasis                                                                            | 3.15490196          |
| ECRi6hAPF > WT6hAPF | 3       | GO:0045479 | vesicle targeting to fusome                                                                     | 2.294136288         |
| ECRi6hAPF > WT6hAPF | 3       | GO:0042554 | superoxide anion generation                                                                     | 2.294136288         |
| ECRi6hAPF > WT6hAPF | 3       | GO:0070731 | cGMP transport                                                                                  | 2.294136288         |
| ECRi6hAPF > WT6hAPF | 4       | GO:0040003 | chitin-based cuticle development                                                                | 16.55284197         |
| ECRi6hAPF > WT6hAPF | 4       | GO:0048082 | regulation of adult chitin-containing cuticle pigmentation                                      | 3.244125144         |
| ECRi6hAPF > WT6hAPF | 4       | GO:0045187 | regulation of circadian sleep/wake cycle, sleep                                                 | 2.627087997         |
| ECRi6hAPF > WT6hAPF | 4       | GO:0048066 | developmental pigmentation                                                                      | 2.586700236         |
| ECRi6hAPF > WT6hAPF | 4       | GO:0043042 | amino acid adenylation by nonribosomal peptide synthase                                         | 2.438898616         |
| WT6hAPF > ECRi6hAPF | 1       | GO:0045214 | sarcomere organization                                                                          | 4.119186408         |
| WT6hAPF > ECRi6hAPF | 1       | GO:0007525 | somatic muscle development                                                                      | 3.958607315         |
| WT6hAPF > ECRi6hAPF | 1       | GO:0065008 | regulation of biological quality                                                                | 3.346787486         |
| WT6hAPF > ECRi6hAPF | 1       | GO:0060402 | calcium ion transport into cytosol                                                              | 3.259637311         |
| WT6hAPF > ECRi6hAPF | 1       | GO:0010888 | negative regulation of lipid storage                                                            | 2.966576245         |
| WT6hAPF > ECRi6hAPF | 2       | GO:0010025 | wax biosynthetic process                                                                        | 3.366531544         |
| WT6hAPF > ECRi6hAPF | 2       | GO:0055085 | transmembrane transport                                                                         | 2.872895202         |
| WT6hAPF > ECRi6hAPF | 2       | GO:0030431 | sleep                                                                                           | 2.484126156         |
| WT6hAPF > ECRi6hAPF | 2       | GO:0042752 | regulation of circadian rhythm                                                                  | 2.454692884         |
| WT6hAPF > ECRi6hAPF | 2       | GO:0007476 | imaginal disc-derived wing morphogenesis                                                        | 2.282329497         |
| WT6hAPF > ECRi6hAPF | 3       | GO:0008299 | isoprenoid biosynthetic process                                                                 | 7.455931956         |
| WT6hAPF > ECRi6hAPF | 3       | GO:0051923 | sulfation                                                                                       | 4.318758763         |
| WT6hAPF > ECRi6hAPF | 3       | GO:0003383 | apical constriction                                                                             | 3.886056648         |
| WT6hAPF > ECRi6hAPF | 3       | GO:0016476 | regulation of embryonic cell shape                                                              | 2.974694135         |
| WT6hAPF > ECRi6hAPF | 3       | GO:0006805 | xenobiotic metabolic process                                                                    | 2.718966633         |
| WT6hAPF > ECRi6hAPF | 4       | GO:0071329 | cellular response to sucrose stimulus                                                           | 2.468521083         |

|                     |   |            |                                          |             |
|---------------------|---|------------|------------------------------------------|-------------|
| WT6hAPF > ECRi6hAPF | 4 | GO:0050709 | negative regulation of protein secretion | 2.244125144 |
| WT6hAPF > ECRi6hAPF | 4 | GO:0001676 | long-chain fatty acid metabolic process  | 2.096910013 |
| WT6hAPF > ECRi6hAPF | 4 | GO:0009651 | response to salt stress                  | 1.987162775 |
| WT6hAPF > ECRi6hAPF | 4 | GO:0006970 | response to osmotic stress               | 1.826813732 |

**Table S3: Gene Ontology Terms for EcR Binding Sites (top five)**

| Overlap Type   | GO.ID      | Term                                                                 | p-value<br>(-log10) |
|----------------|------------|----------------------------------------------------------------------|---------------------|
| +6hAPF Unique  | GO:0007476 | imaginal disc-derived wing morphogenesis                             | 4.040958608         |
| +6hAPF Unique  | GO:0002009 | morphogenesis of an epithelium                                       | 3.420216403         |
| +6hAPF Unique  | GO:0035152 | regulation of tube architecture, open tracheal system                | 3.366531544         |
| +6hAPF Unique  | GO:0018107 | peptidyl-threonine phosphorylation                                   | 3.236572006         |
| +6hAPF Unique  | GO:0007370 | ventral furrow formation                                             | 3.207608311         |
| -6h/+6h Stable | GO:0007476 | imaginal disc-derived wing morphogenesis                             | 8.142667504         |
| -6h/+6h Stable | GO:0048190 | wing disc dorsal/ventral pattern formation                           | 6.259637311         |
| -6h/+6h Stable | GO:0007156 | homophilic cell adhesion via plasma membrane adhesion molecules      | 5.15490196          |
| -6h/+6h Stable | GO:0007411 | axon guidance                                                        | 4.853871964         |
| -6h/+6h Stable | GO:0016318 | ommatidial rotation                                                  | 4.769551079         |
| -6hAPF Unique  | GO:0000122 | negative regulation of transcription from RNA polymerase II promoter | 20.92081875         |
| -6hAPF Unique  | GO:0007476 | imaginal disc-derived wing morphogenesis                             | 20.76955108         |
| -6hAPF Unique  | GO:0007411 | axon guidance                                                        | 15.38721614         |
| -6hAPF Unique  | GO:0045944 | positive regulation of transcription from RNA polymerase II promoter | 14.88605665         |
| -6hAPF Unique  | GO:0035277 | spiracle morphogenesis, open tracheal system                         | 12.18045606         |

## References

1. Shlyueva D, et al. (2014) Hormone-responsive enhancer-activity maps reveal predictive motifs, indirect repression, and targeting of closed chromatin. *Mol Cell* 54(1):180–192.
